# Supplementary material for: Synthesis and Fluorescent Properties of Aminopyridines and the Application in “Click and Probing”
Source: MDPI journal article supplement (doi:10.3390/molecules27051596), 2022-02-28

# <sup>1</sup>H and <sup>13</sup>C NMR spectra

Figure S1. Diethyl 2-(*tert*-butylamino)-6-phenylpyridine-3,4-dicarboxylate (**1**, CDCl<sub>3</sub>)

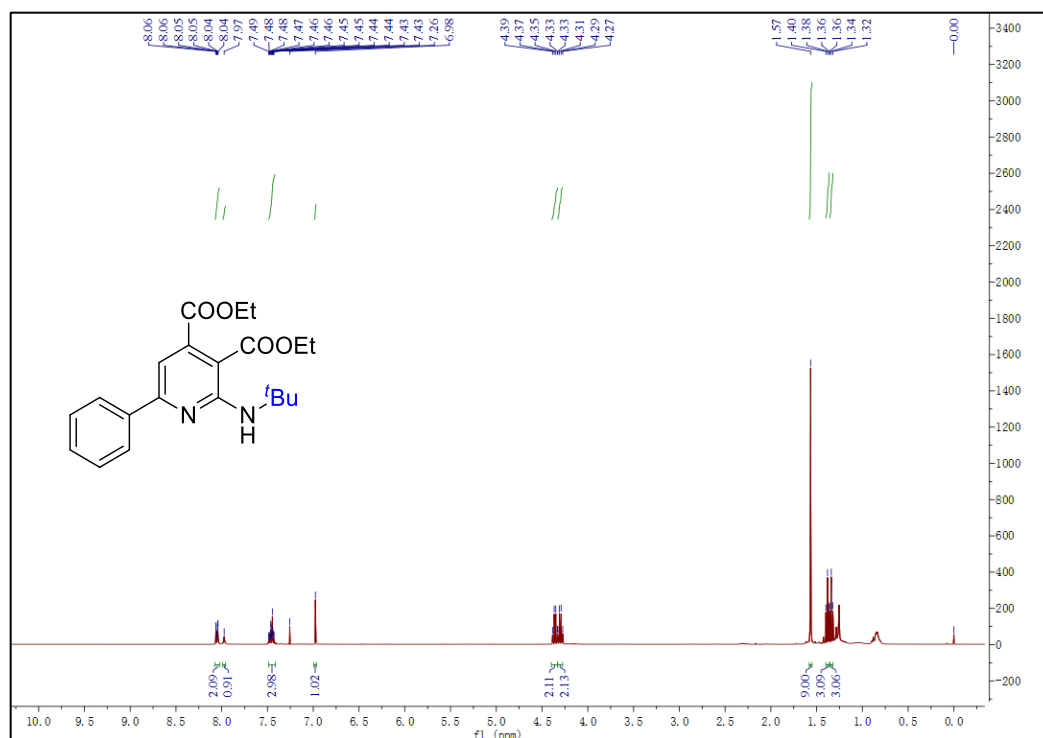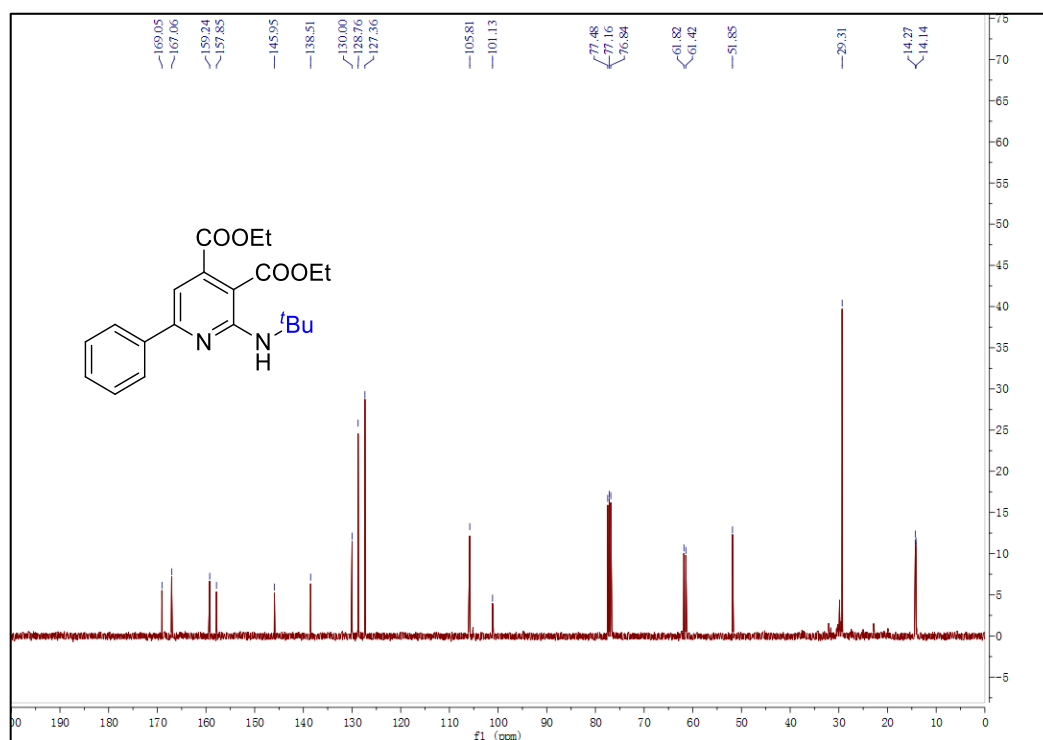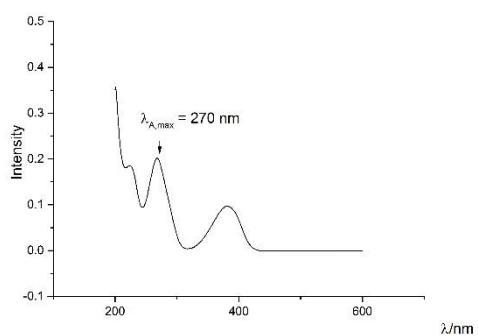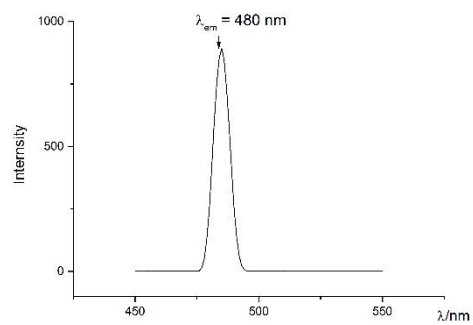

Figure S2. Diethyl 2-(benzylamino)-6-phenylpyridine-3,4-dicarboxylate (**2**, CDCl<sub>3</sub>)

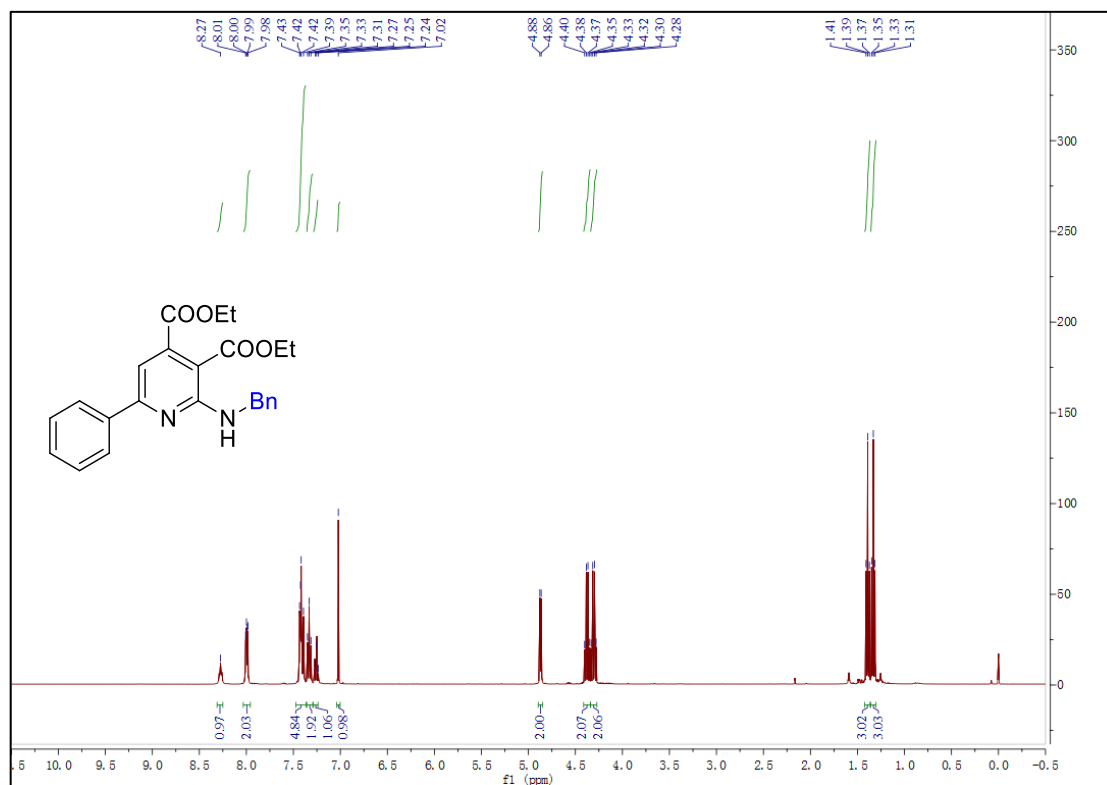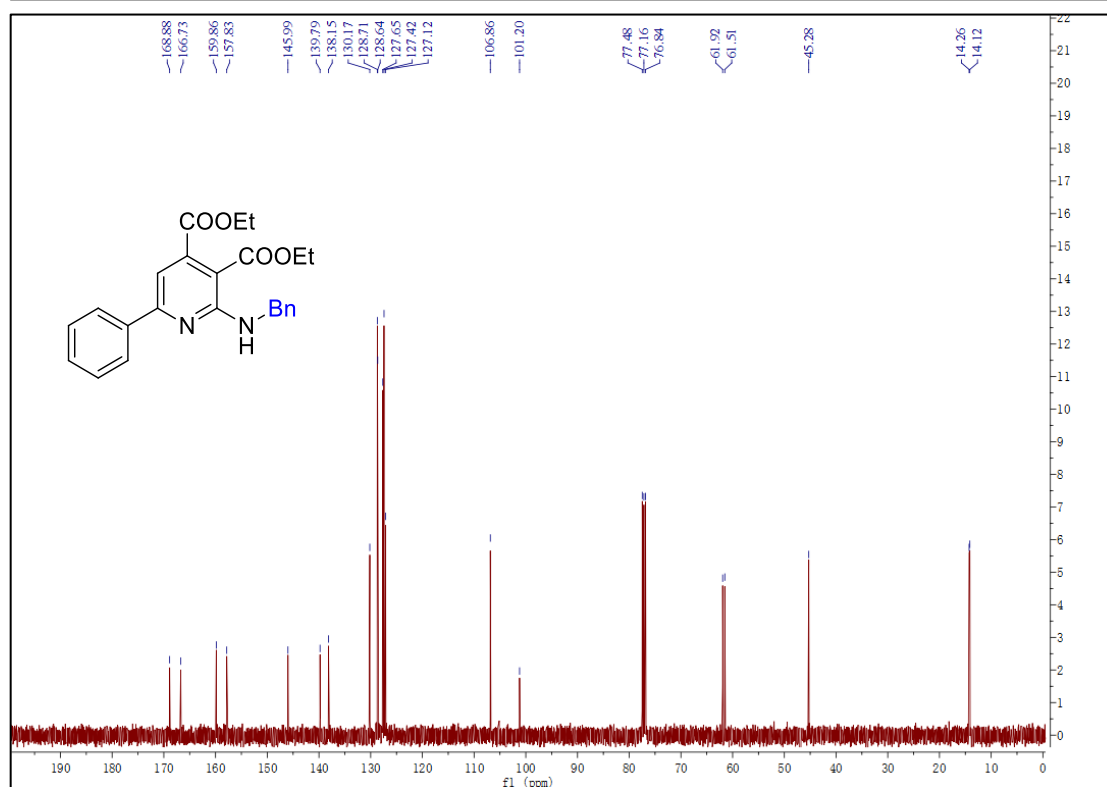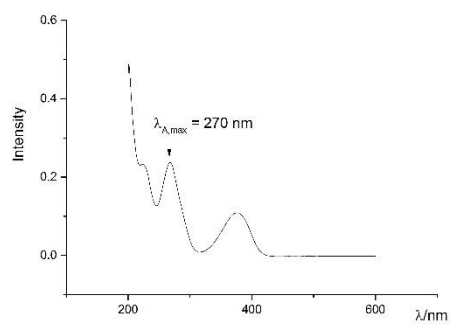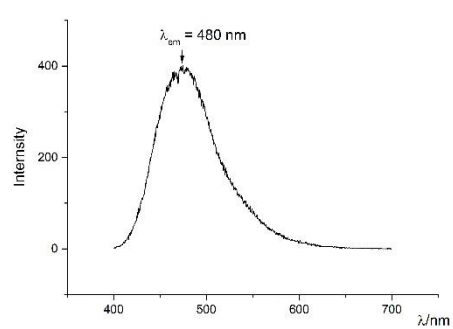

Figure S3. Diethyl 2-(cyclohexylamino)-6-phenylpyridine-3,4-dicarboxylate (**3**, CDCl<sub>3</sub>)

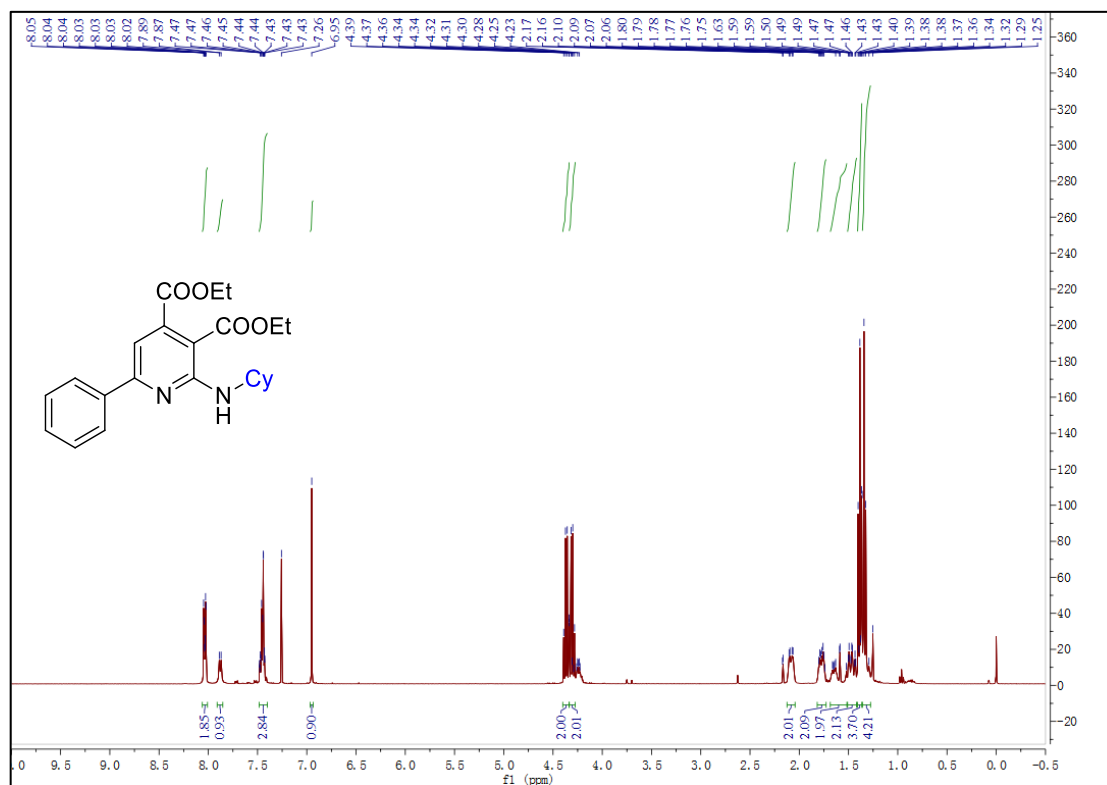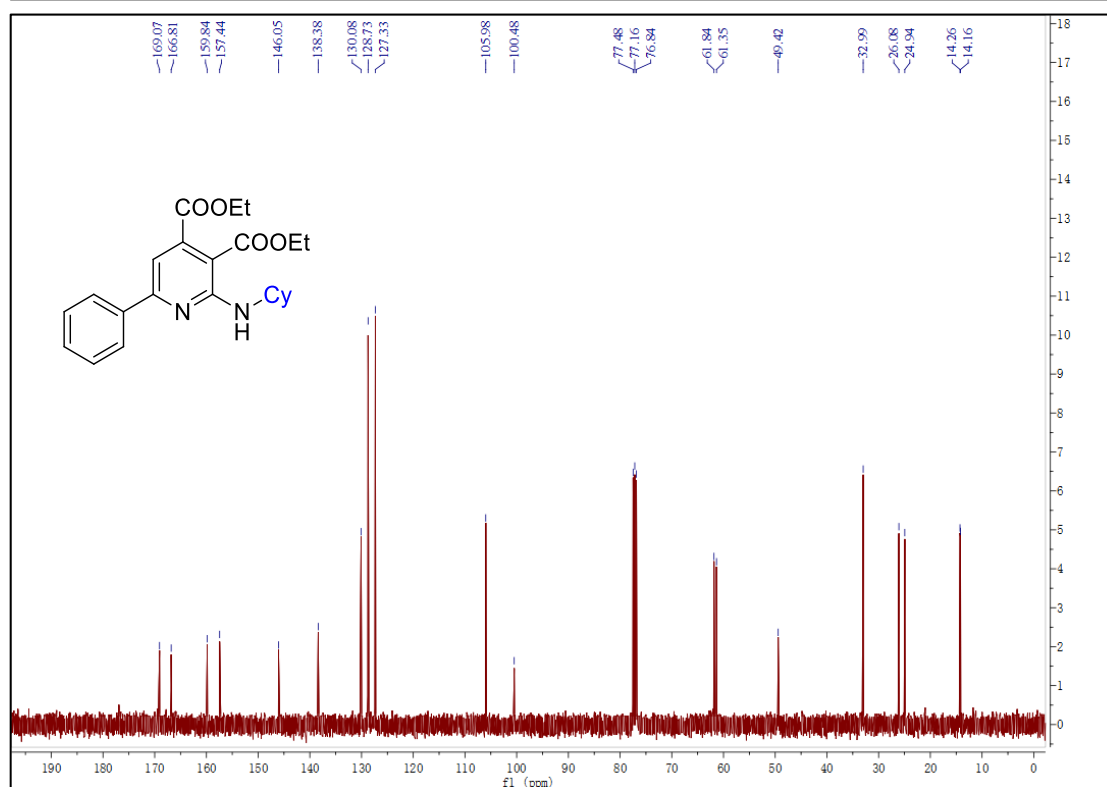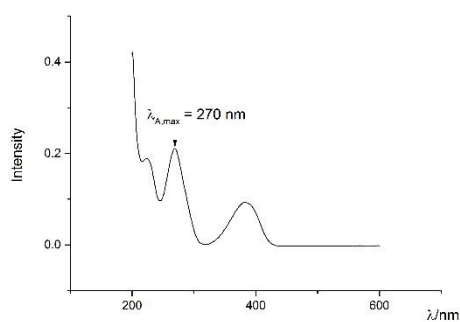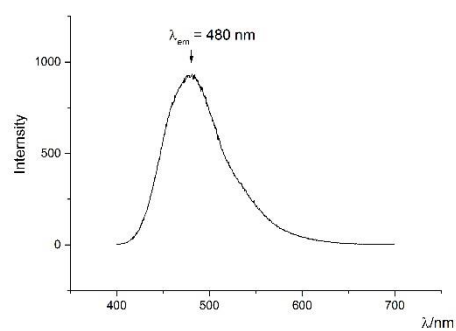

Figure S4. Diethyl 2-(*tert*-butylamino)-6-(4-(trifluoromethyl)phenyl)pyridine-3,4-dicarboxylate (**4**, CDCl<sub>3</sub>)

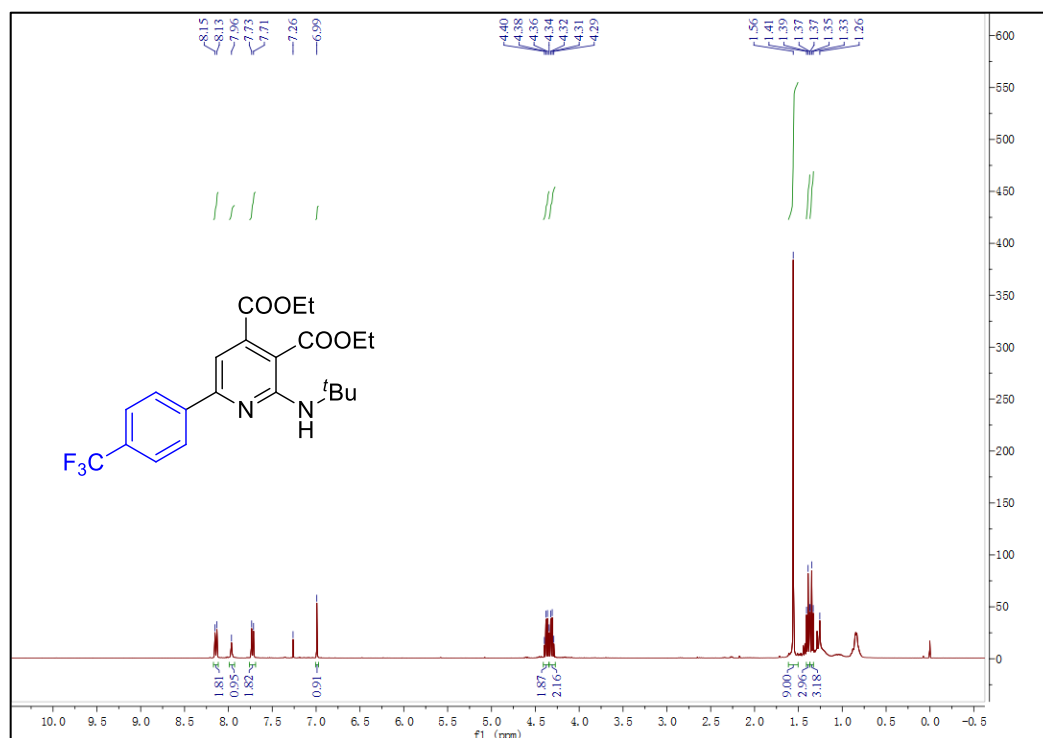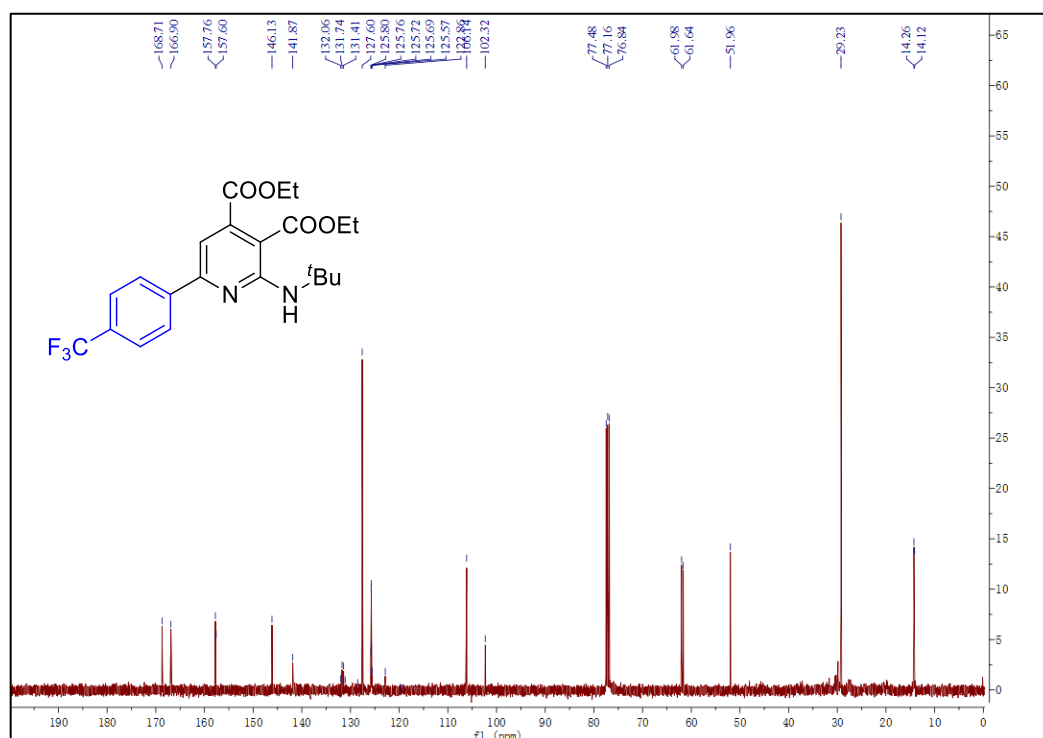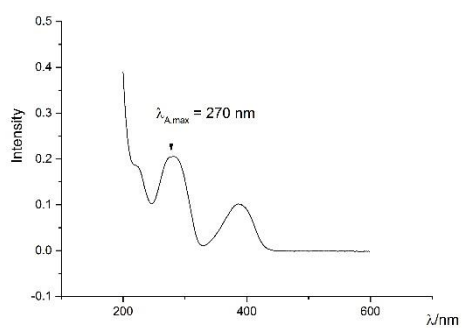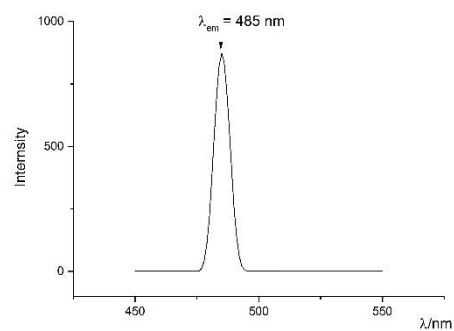

Figure S5. Diethyl 2-(*tert*-butylamino)-6-(*p*-tolyl)pyridine-3,4-dicarboxylate (**5**, CDCl<sub>3</sub>)

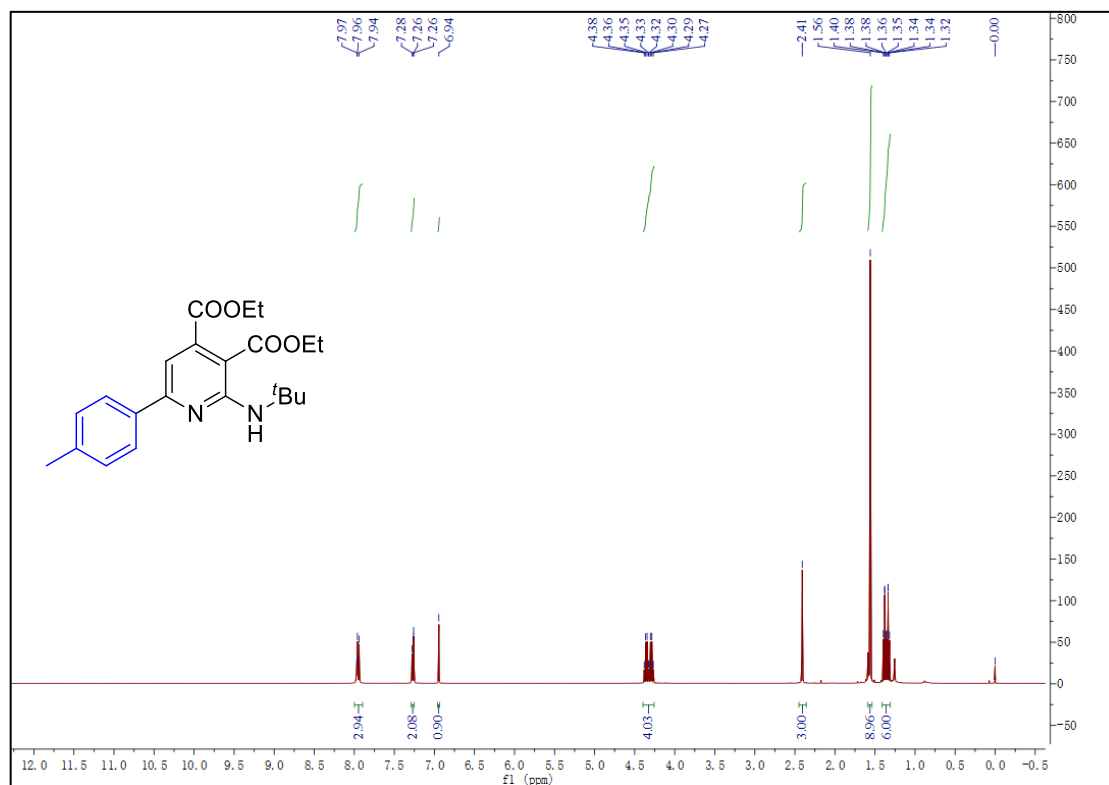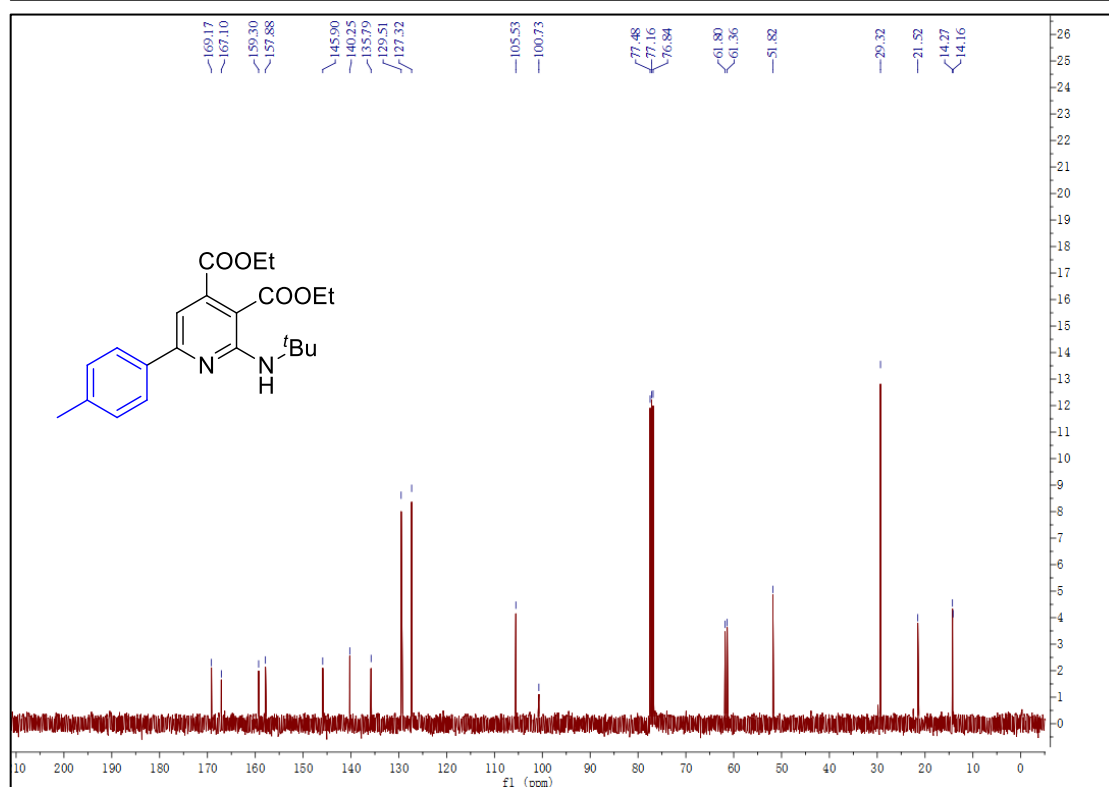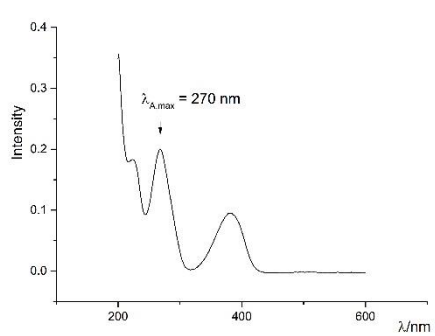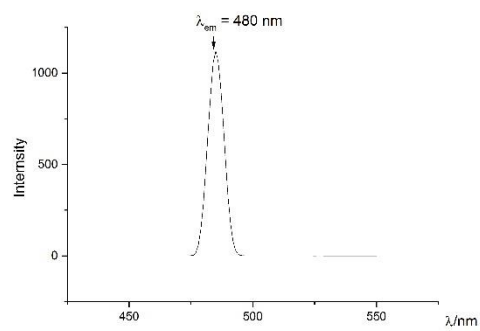

Figure S6. Diethyl 2-(*tert*-butylamino)-6-(*o*-tolyl)pyridine-3,4-dicarboxylate (**6**, CDCl<sub>3</sub>)

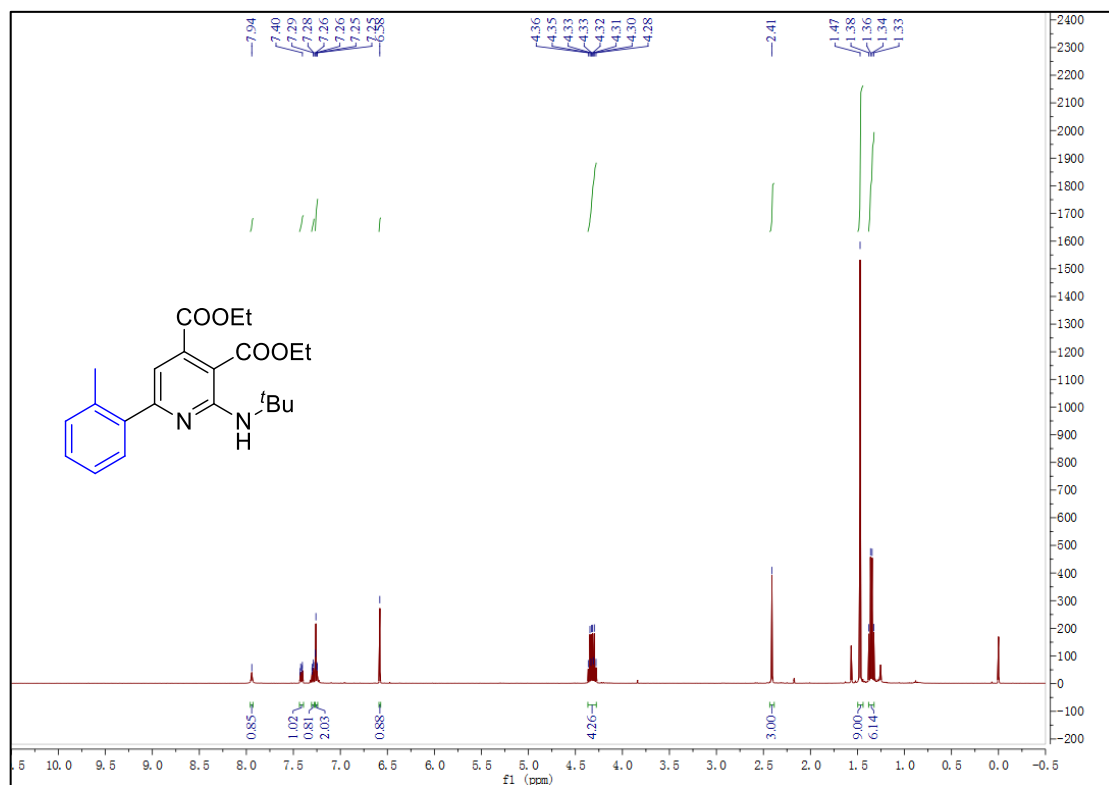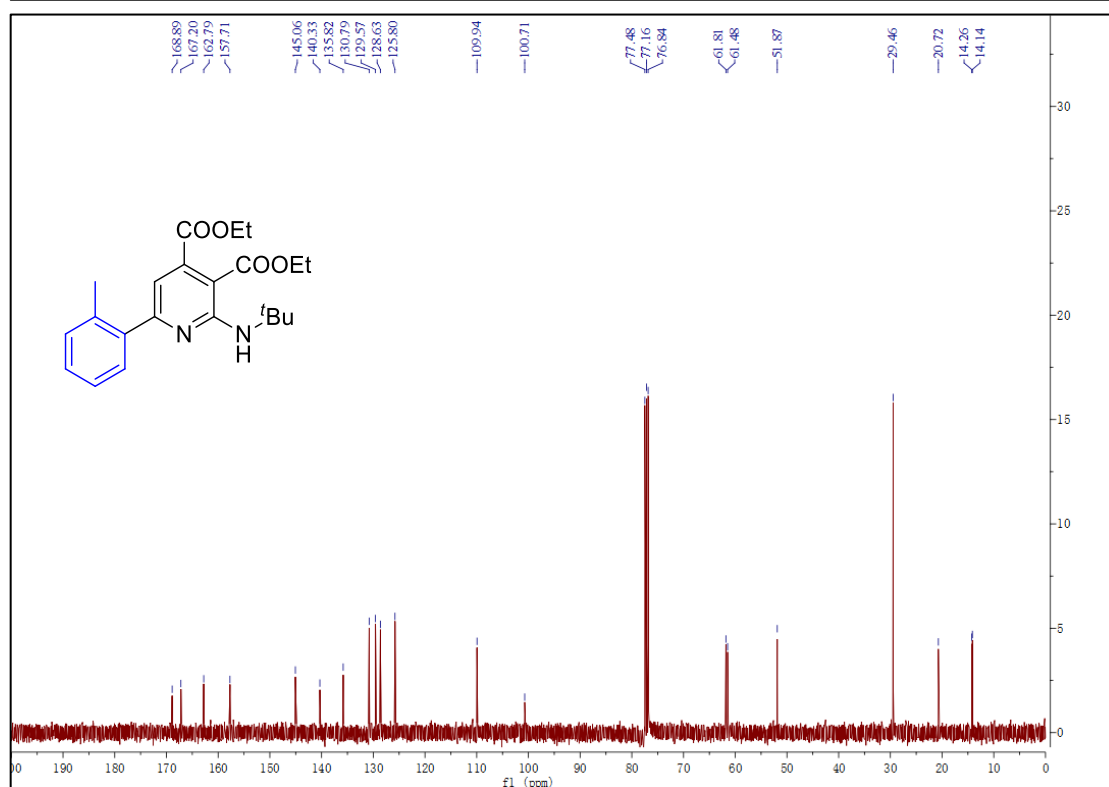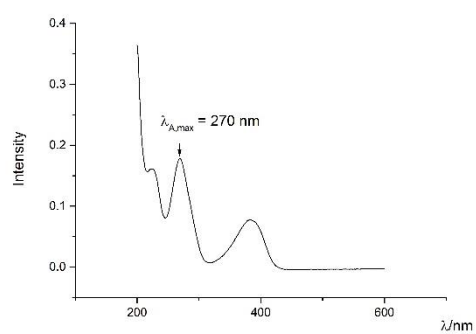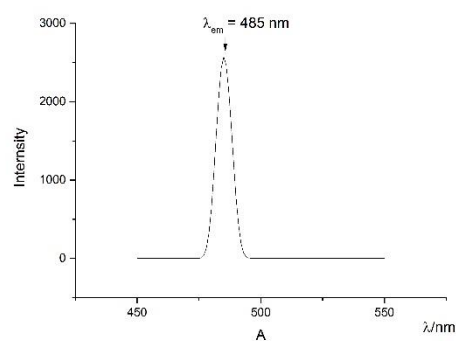

Figure S7. Diethyl 2-(*tert*-butylamino)-6-(4-bromophenyl)pyridine-3,4-dicarboxylate (**7**, CDCl<sub>3</sub>)

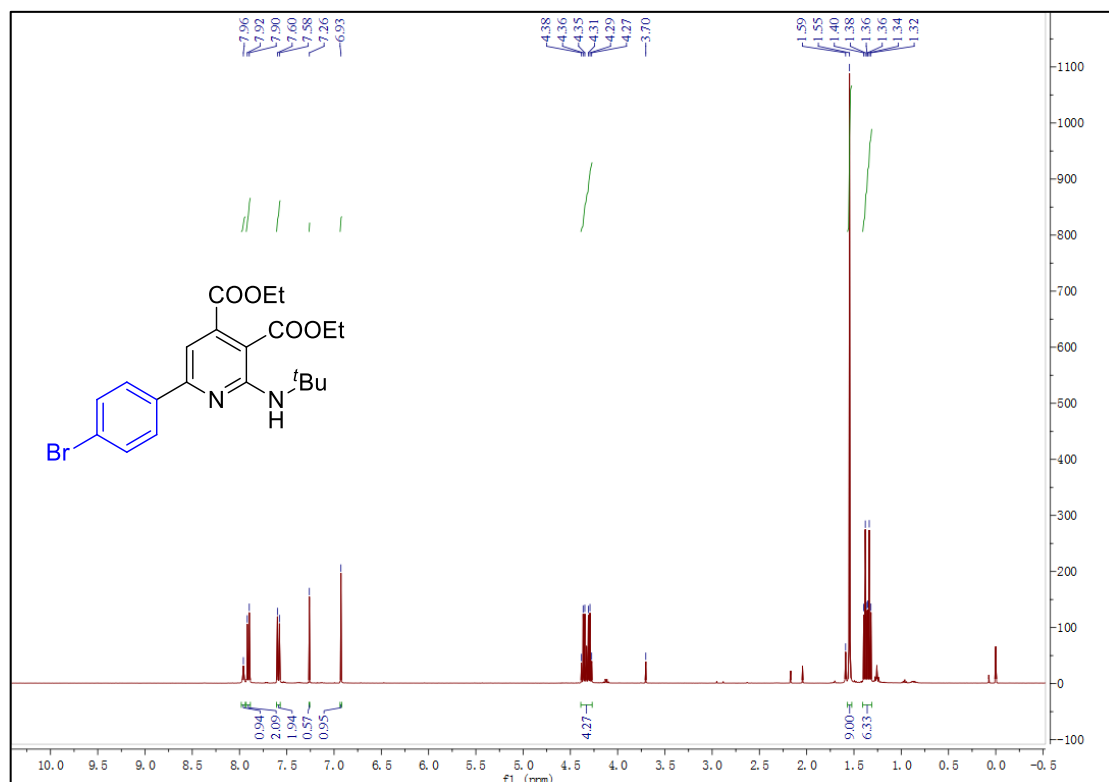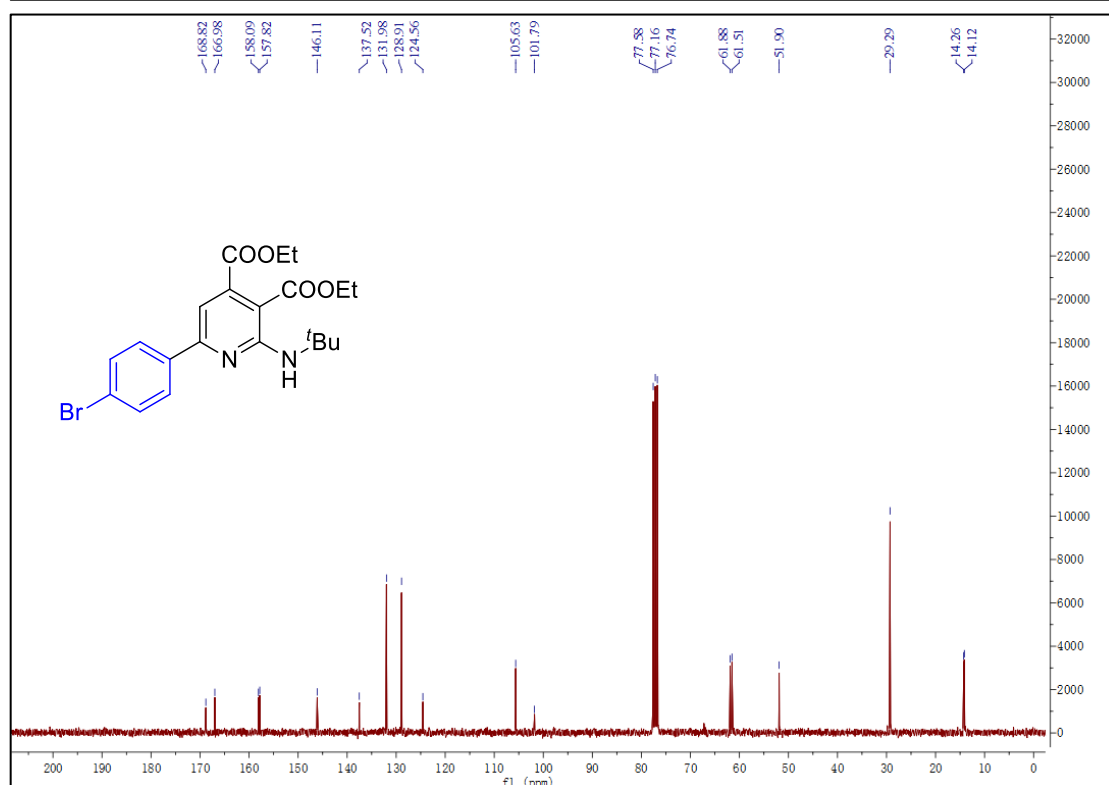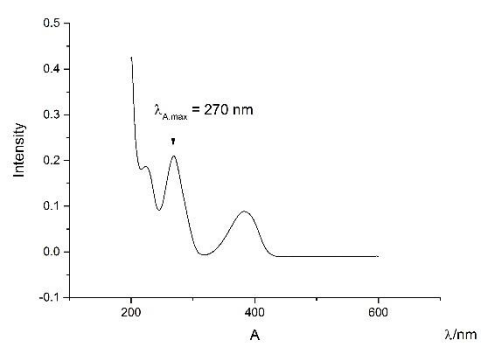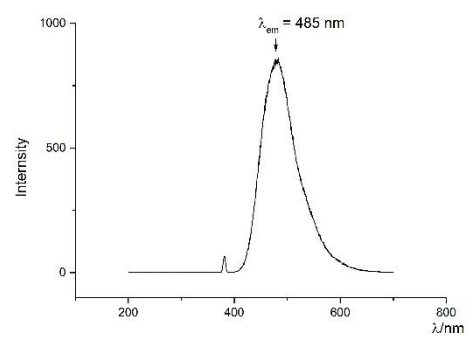

Figure S8. Diethyl 2-(*tert*-butylamino)-6-octylpyridine-3,4-dicarboxylate (**8**, CDCl<sub>3</sub>)

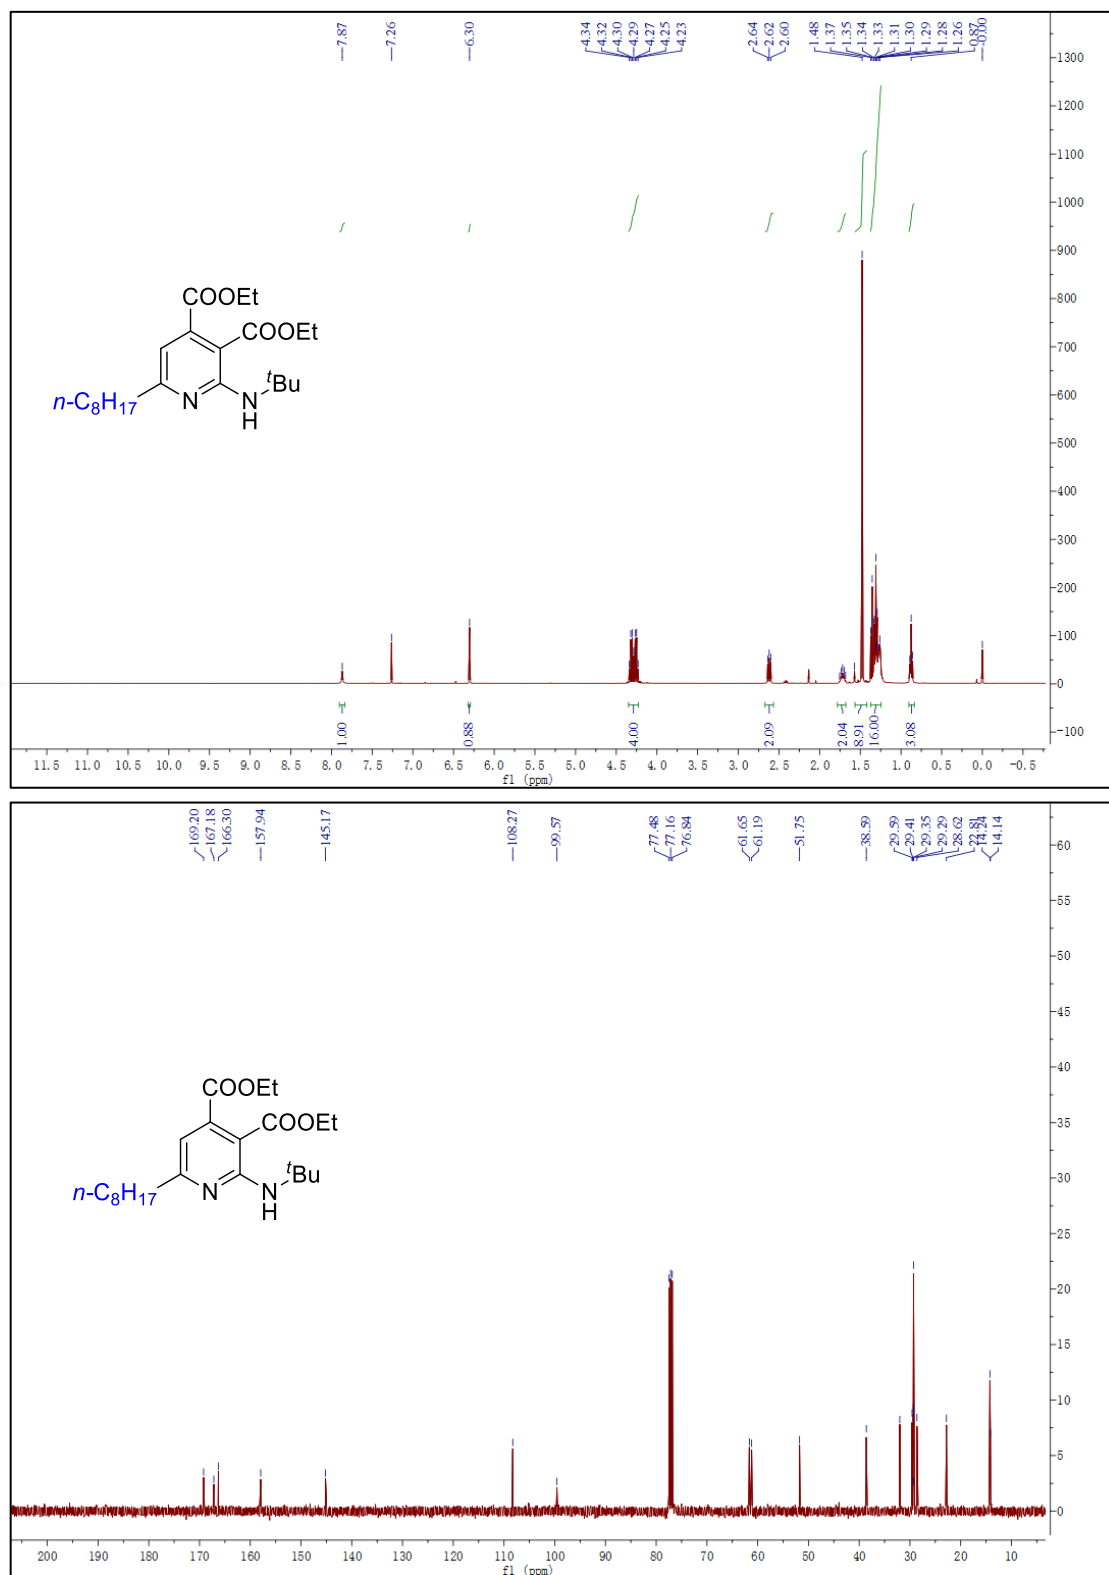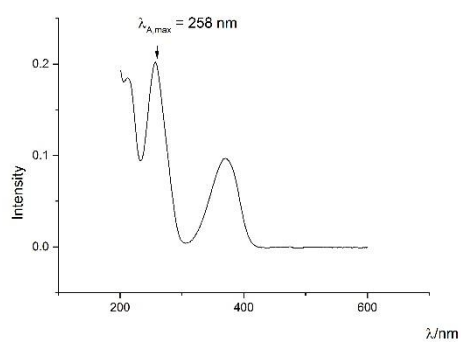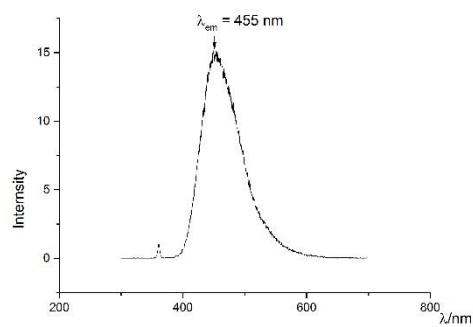

Figure S9. Dimethyl 2-(cyclohexylamino)-6-phenylpyridine-3,4-dicarboxylate (**9**, CDCl<sub>3</sub>)

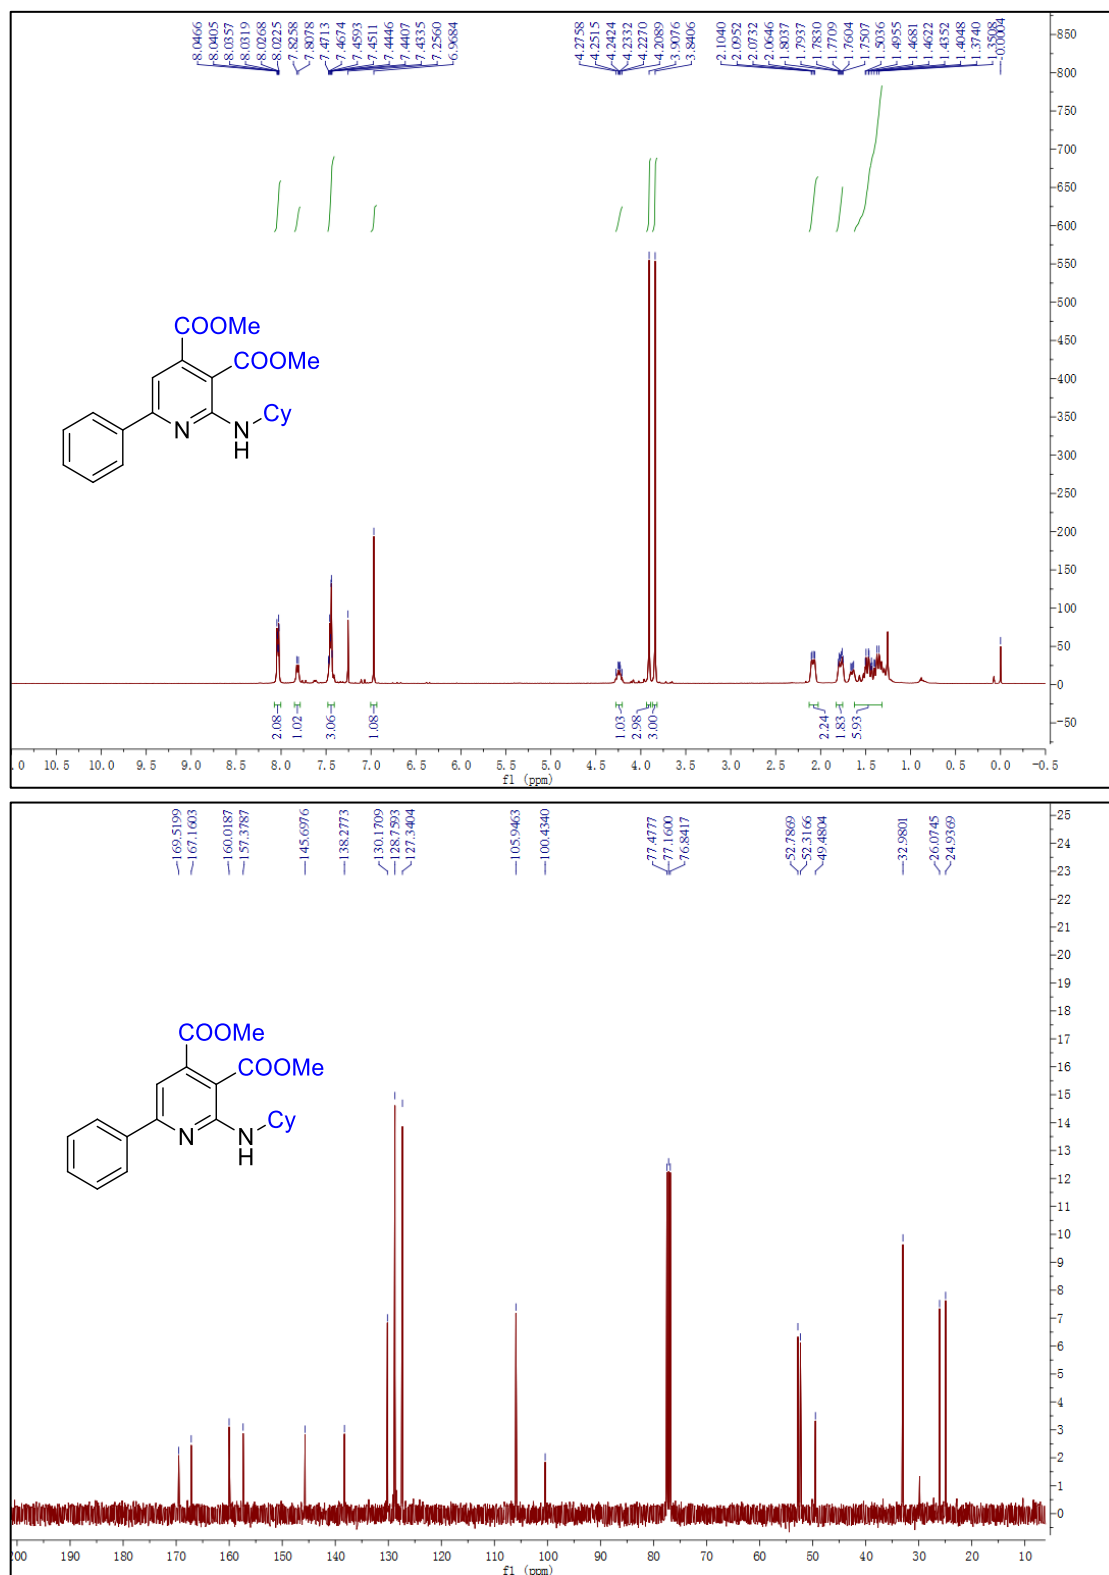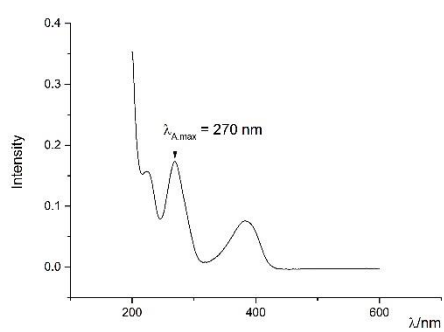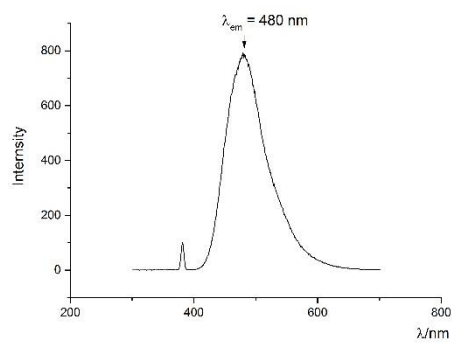

Figure S10. Bis(2-methoxyethyl) 2-(*tert*-butylamino)-6-phenylpyridine-3,4-dicarboxylate (**10**, CDCl<sub>3</sub>)

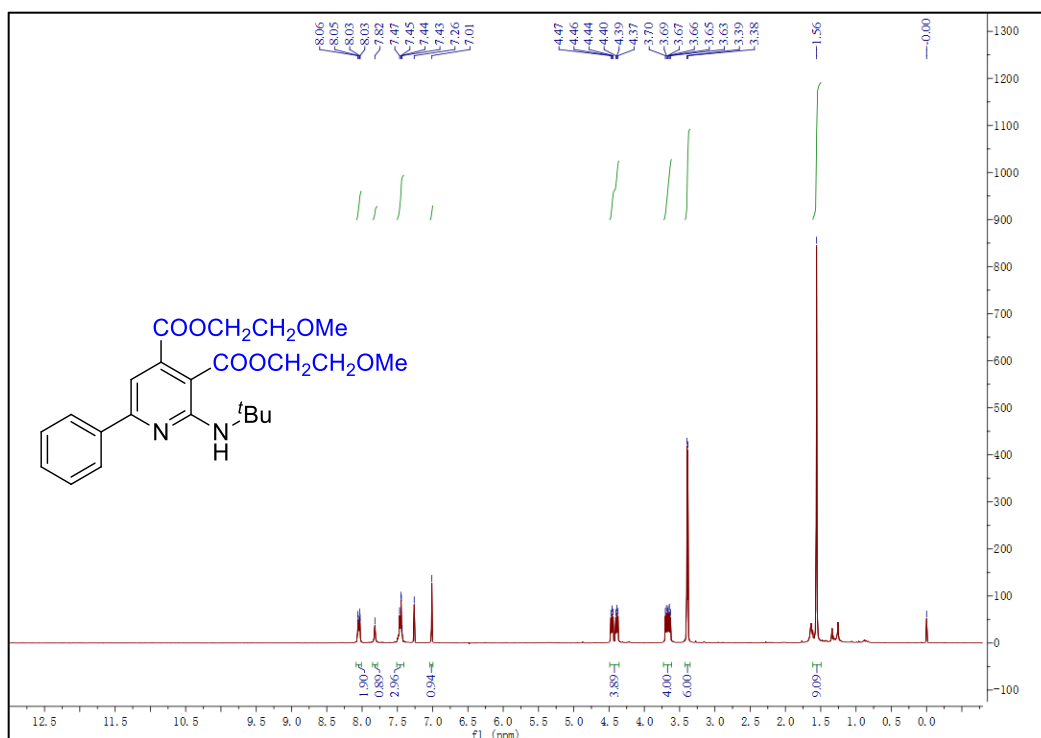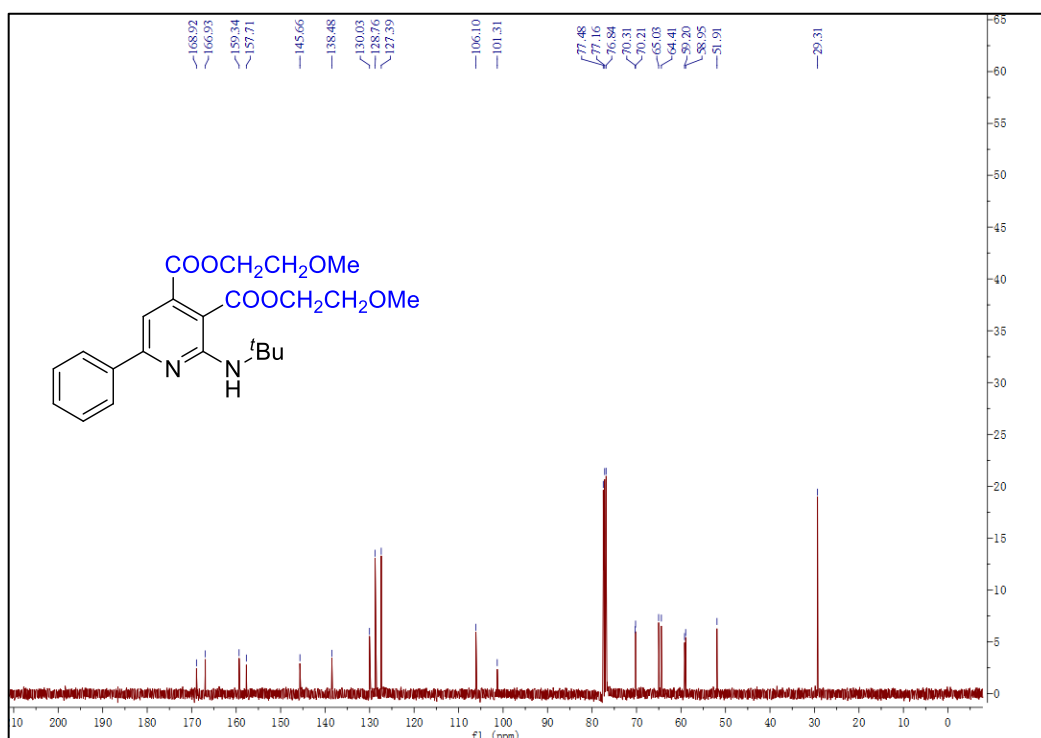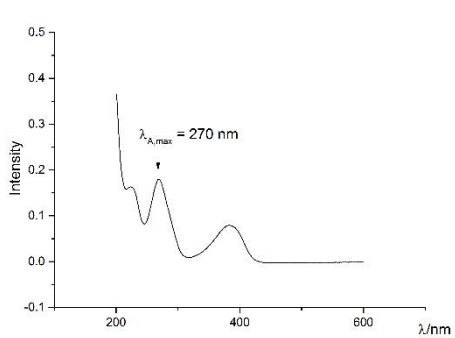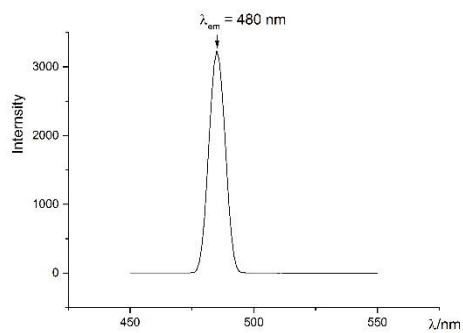

Figure S11. Diethyl 2-amino-6-phenylpyridine-3,4-dicarboxylate (**11**, CDCl<sub>3</sub>)

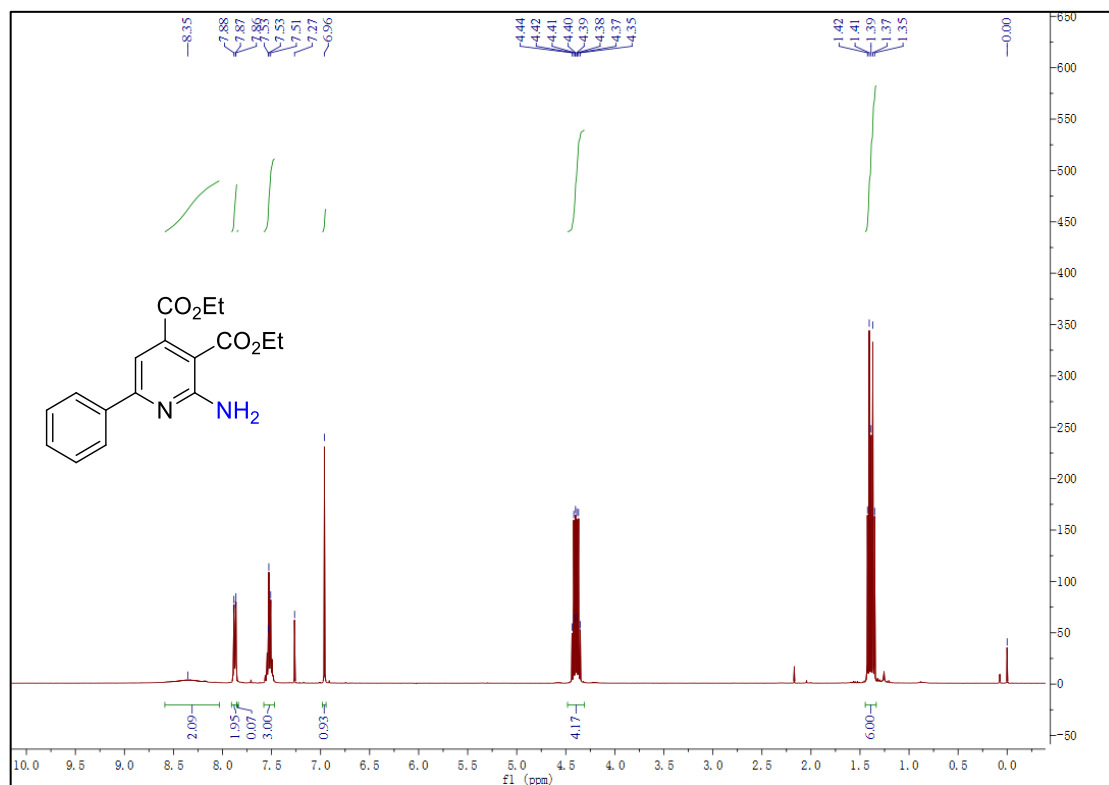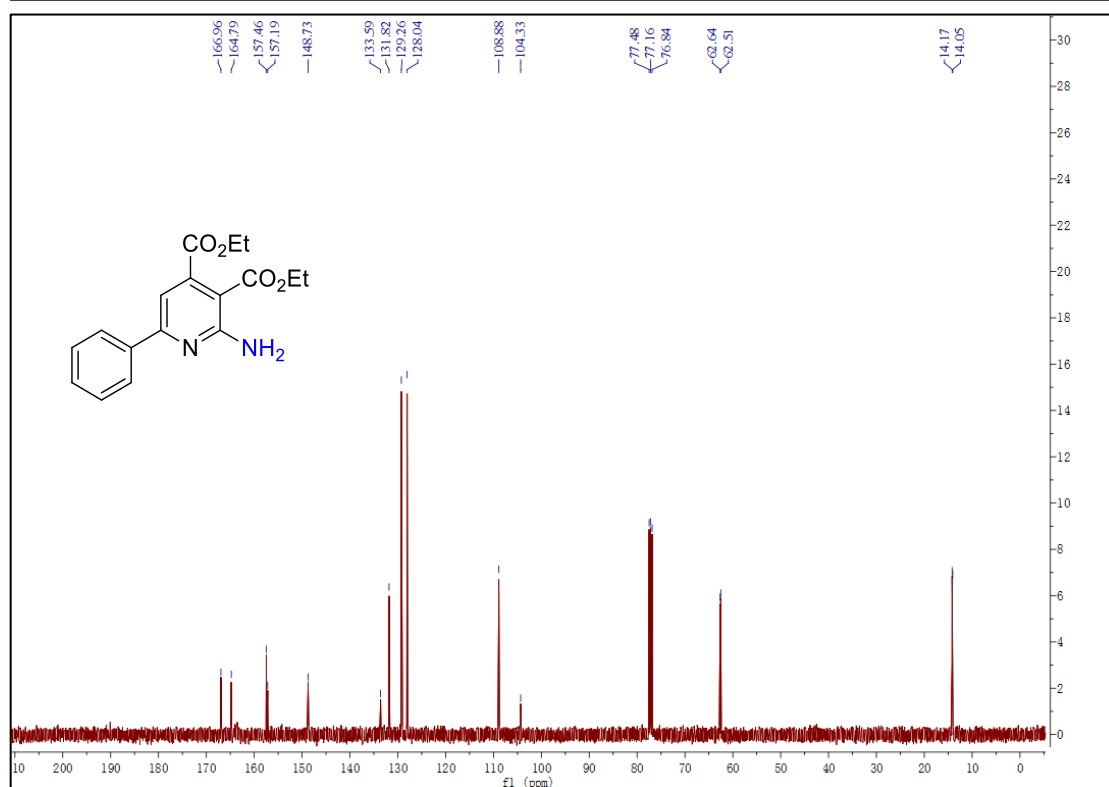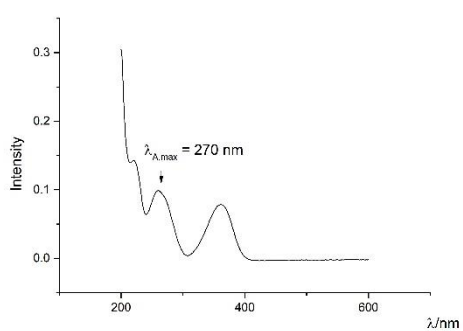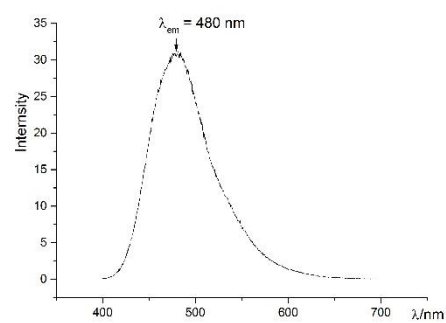

Figure S12. 2-(*tert*-Butylamino)-6-phenylpyridine-3,4-dicarboxylic acid (**12**, DMSO-*d*<sub>6</sub>)

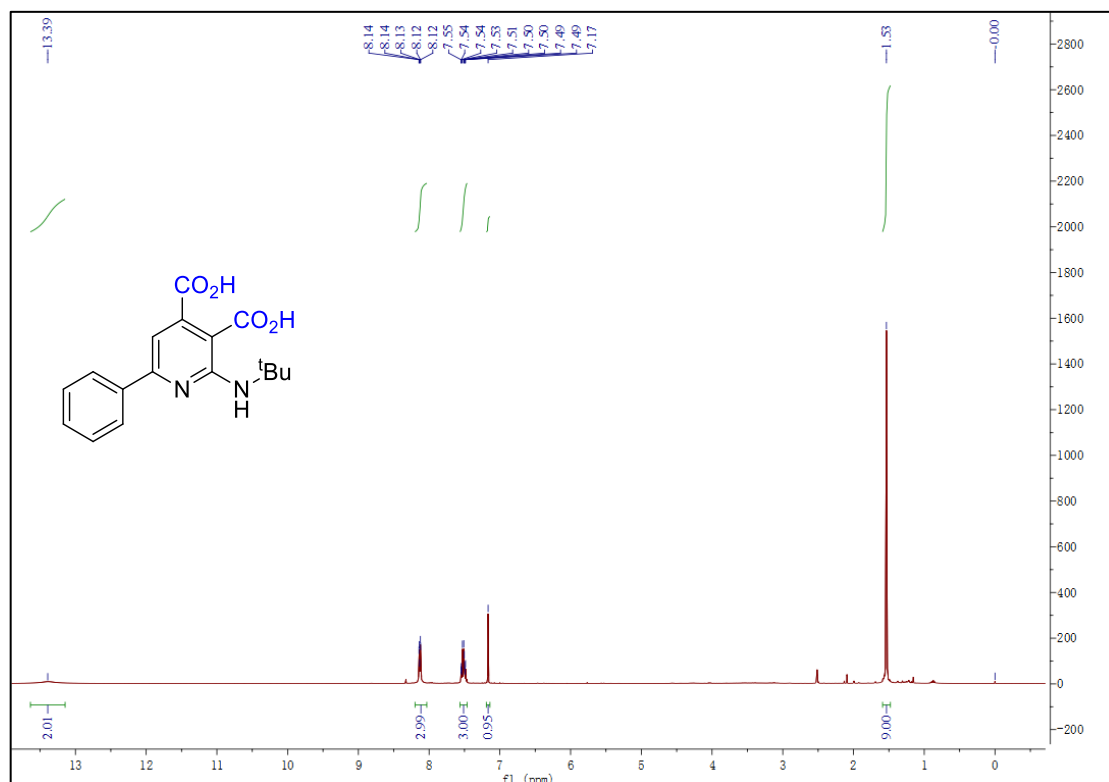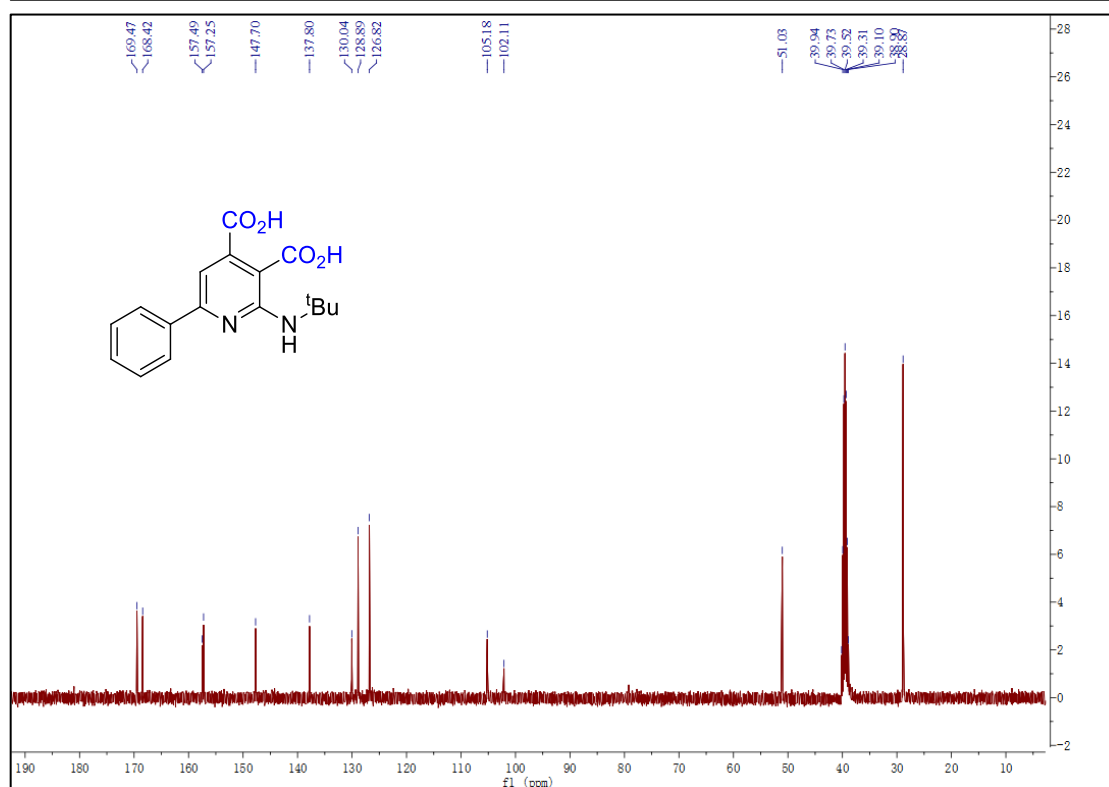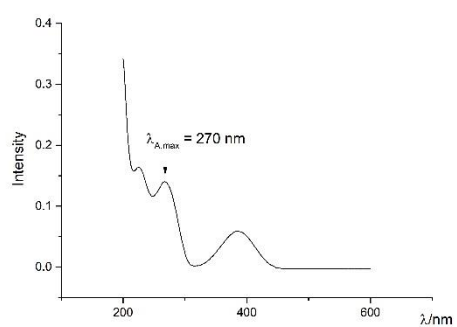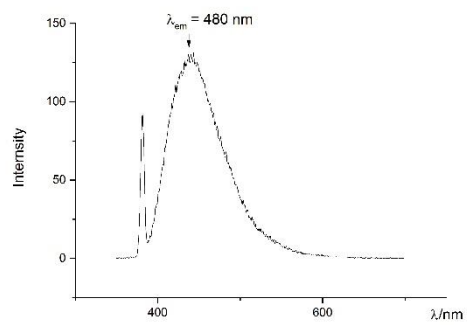

Figure S13. (2-(*tert*-Butylamino)-6-phenylpyridine-3,4-diyl) dimethanol (**13**, CDCl<sub>3</sub>)

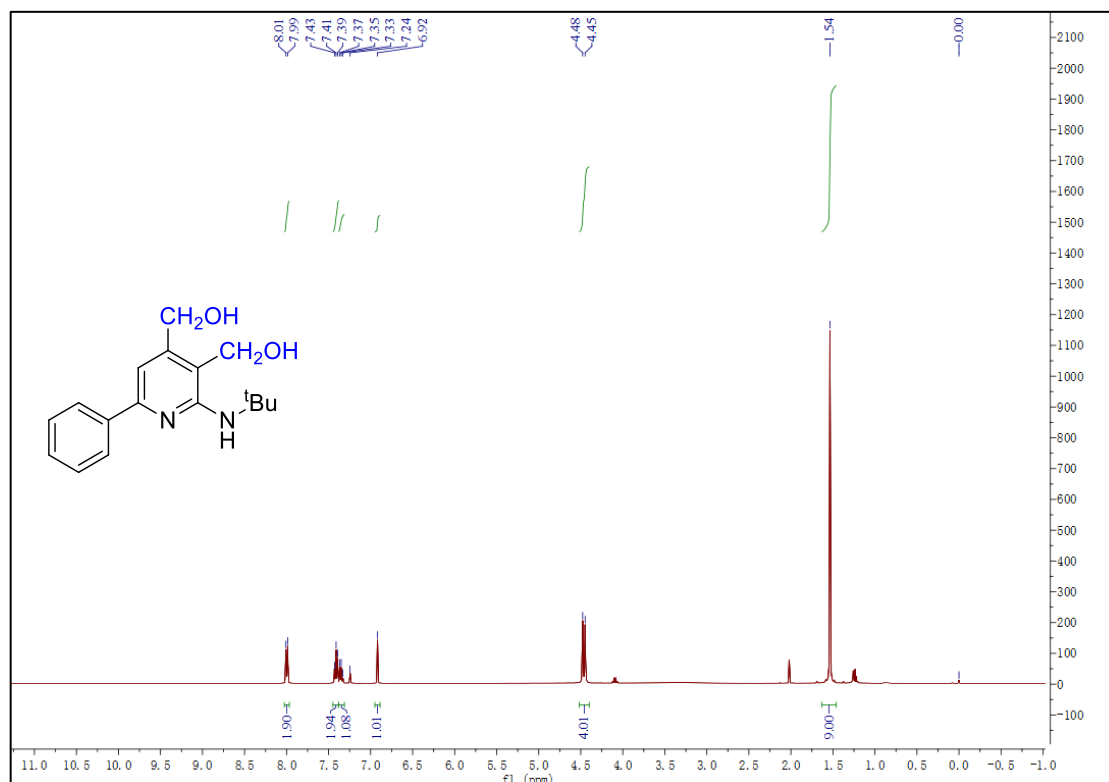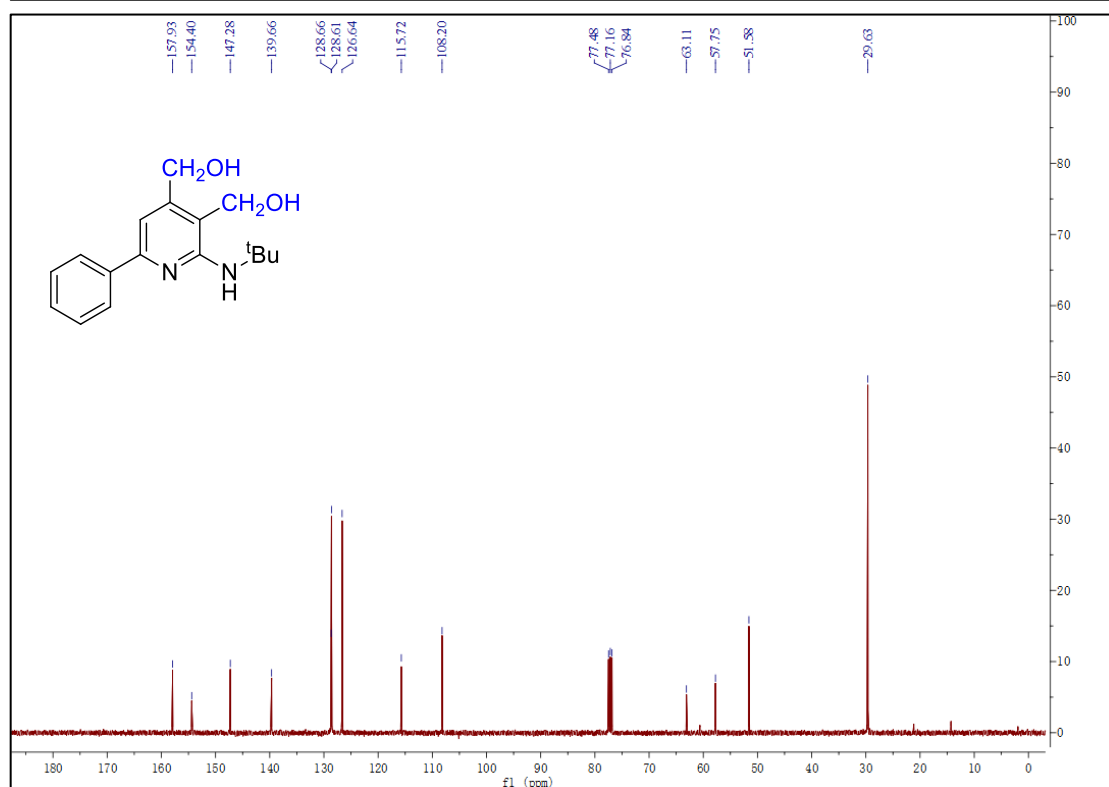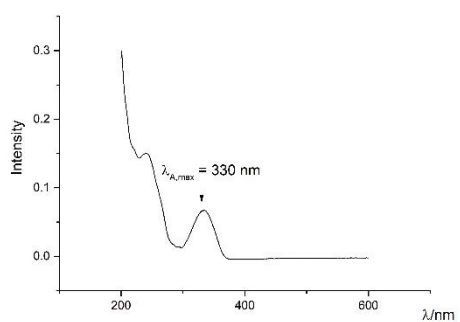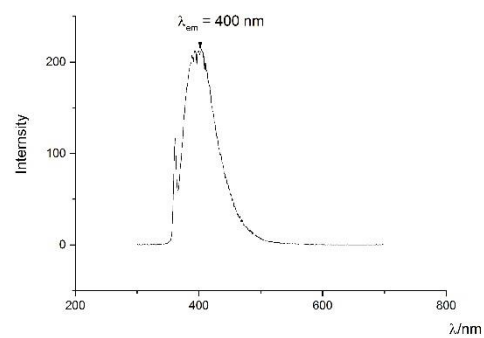

Figure S14. Diethyl 6-((*tert*-butoxycarbonyl)amino)phenyl)-2-(cyclohexylamino)pyridine-3,4-dicarboxylate (**14**, CDCl<sub>3</sub>)

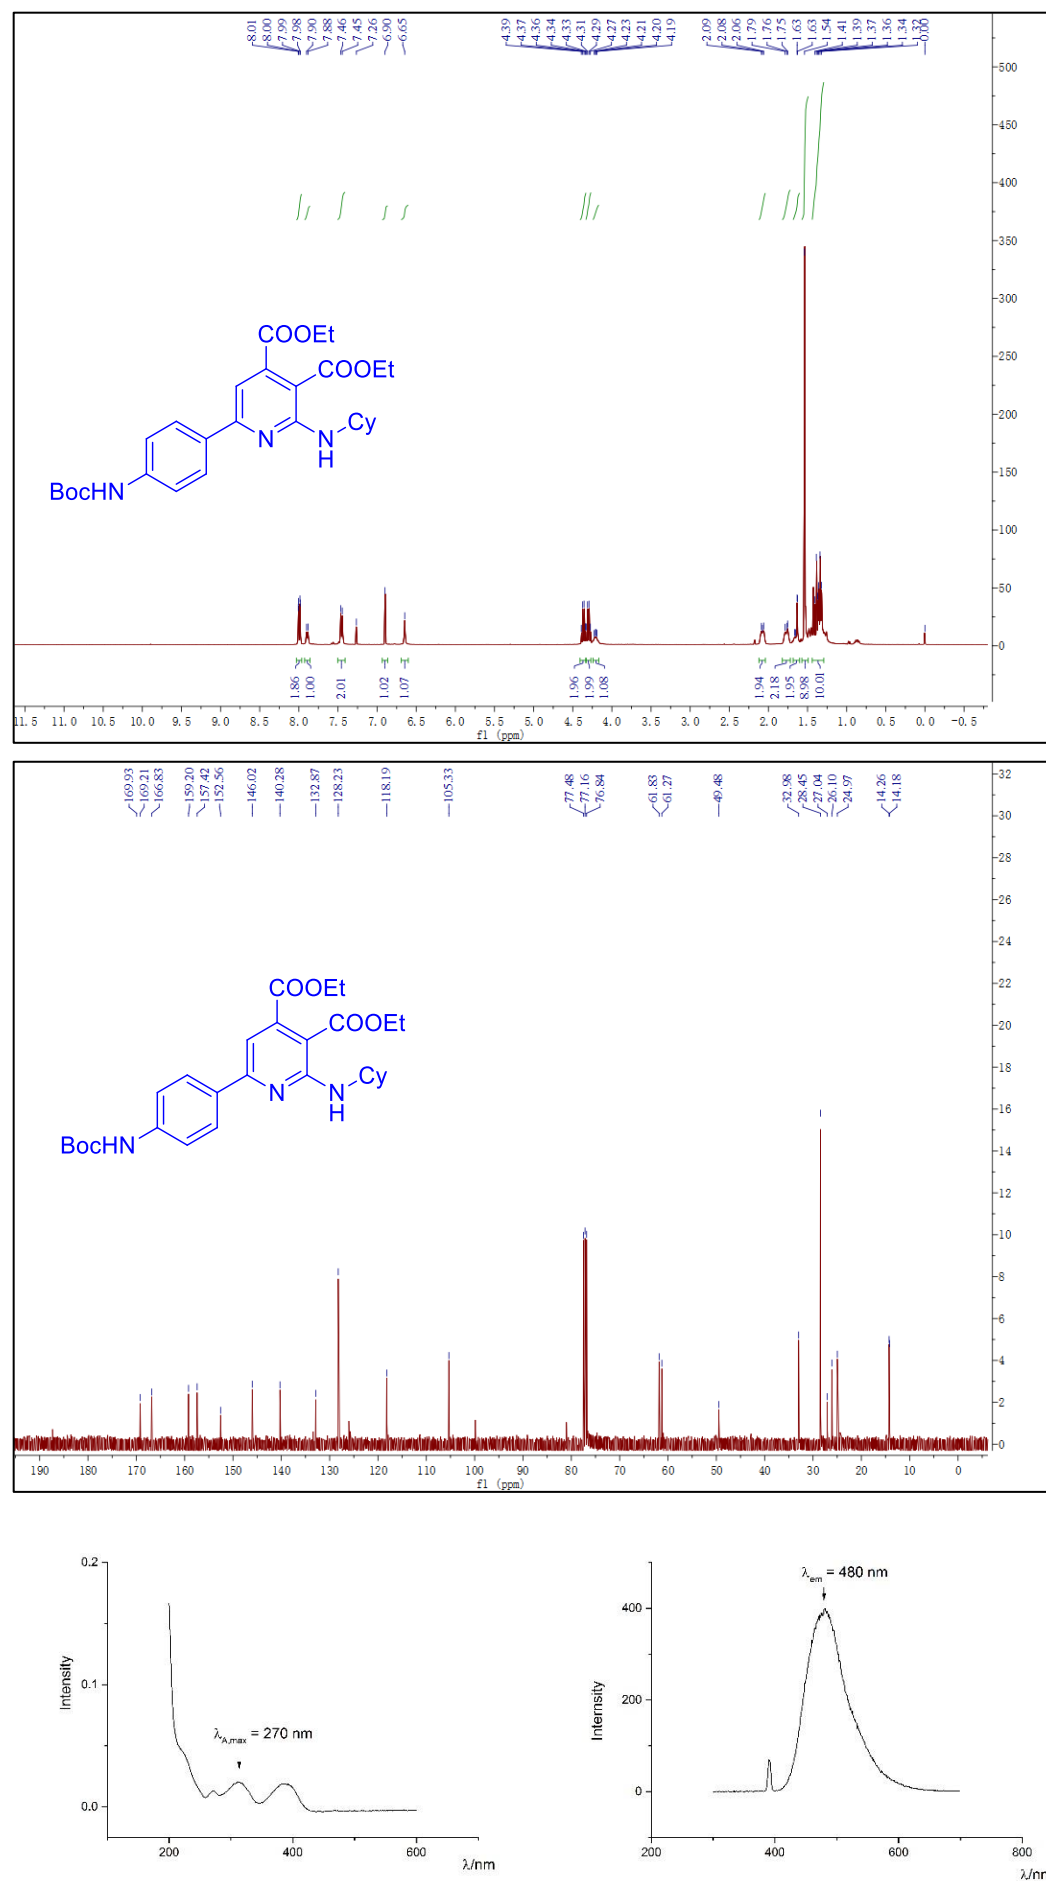

Figure S15. Diethyl 6-(4-azidophenyl)-2-(cyclohexylamino)pyridine-3,4-dicarboxylate (**15**, CDCl<sub>3</sub>)

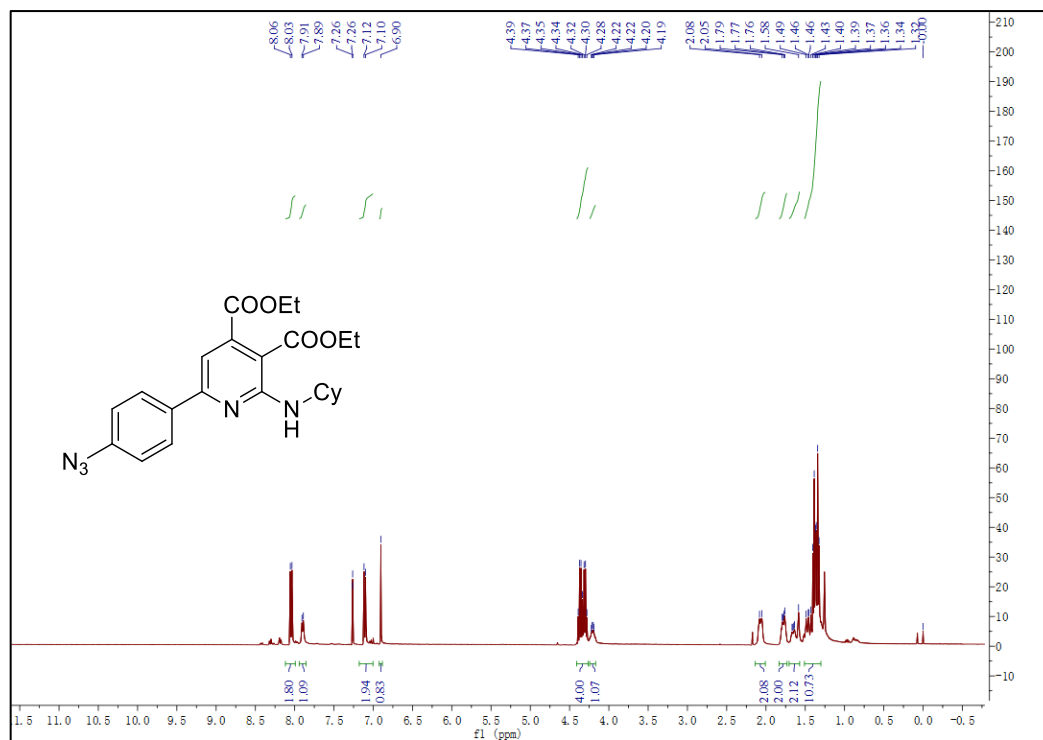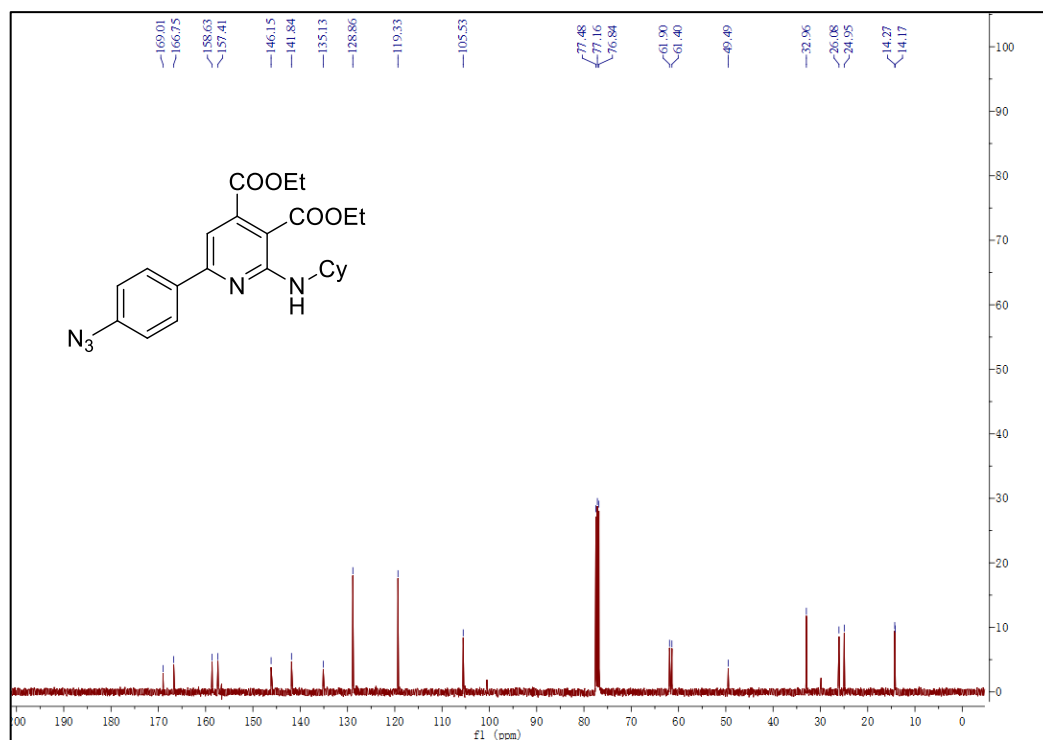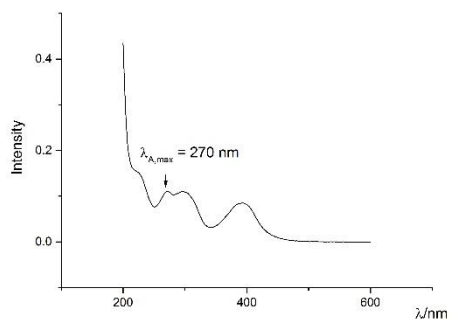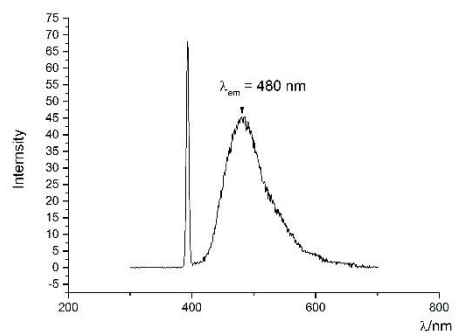

Figure S16. Diethyl 2-(cyclohexylamino)-6-(4-(4-phenyl-1*H*-1,2,3-triazol-1-yl)phenyl)pyridine-3,4-dicarboxylate (**16**, CDCl<sub>3</sub>)

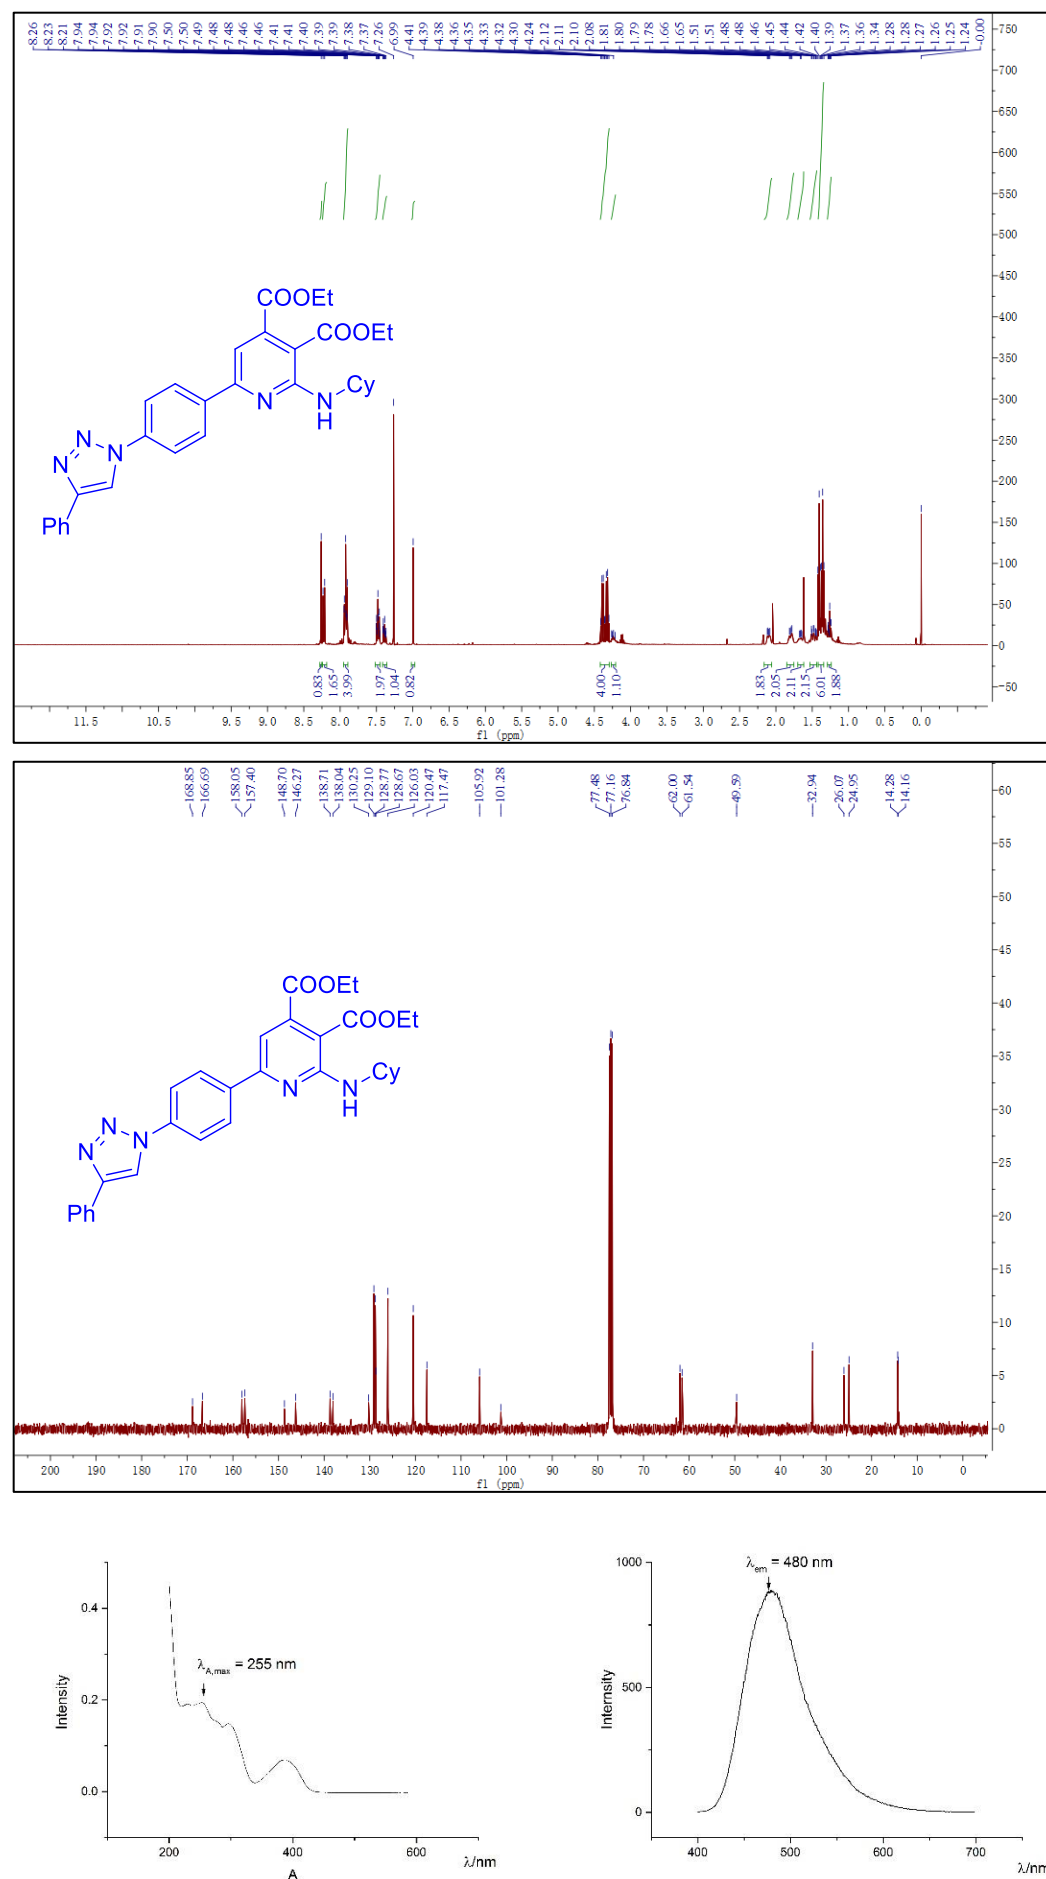

Figure S17. Diethyl 2-(cyclohexylamino)-6-(4-(4-(hydroxymethyl)-1*H*-1,2,3-triazol-1-yl)phenyl)pyridine-3,4-dicarboxylate (**17**, CDCl<sub>3</sub>)

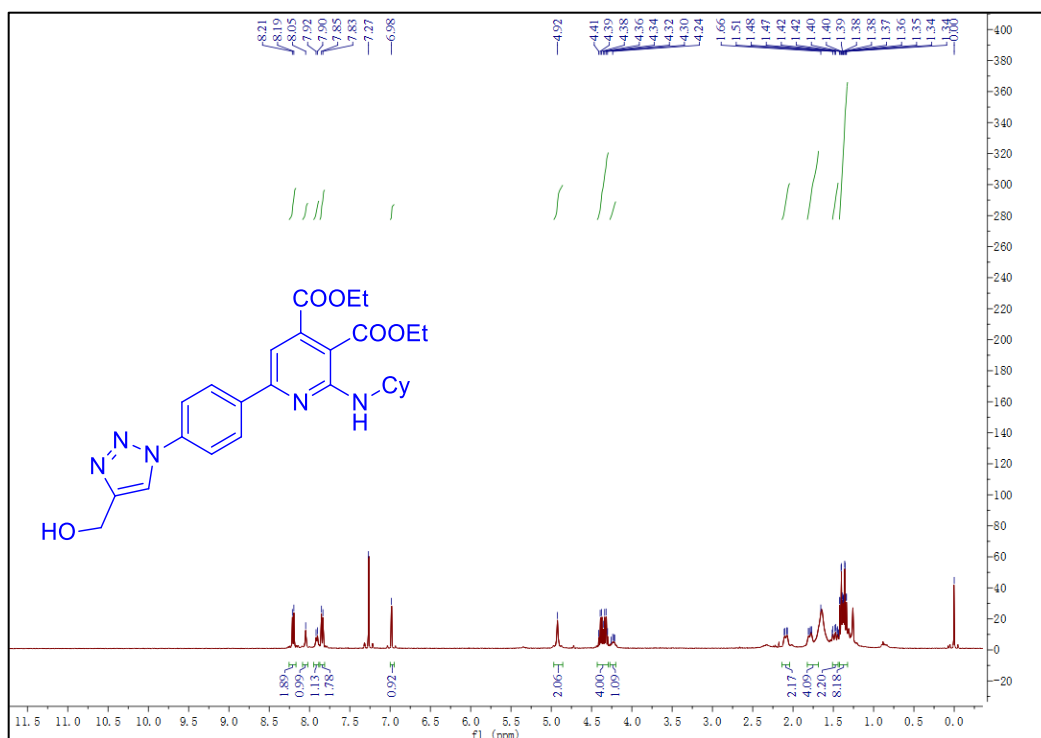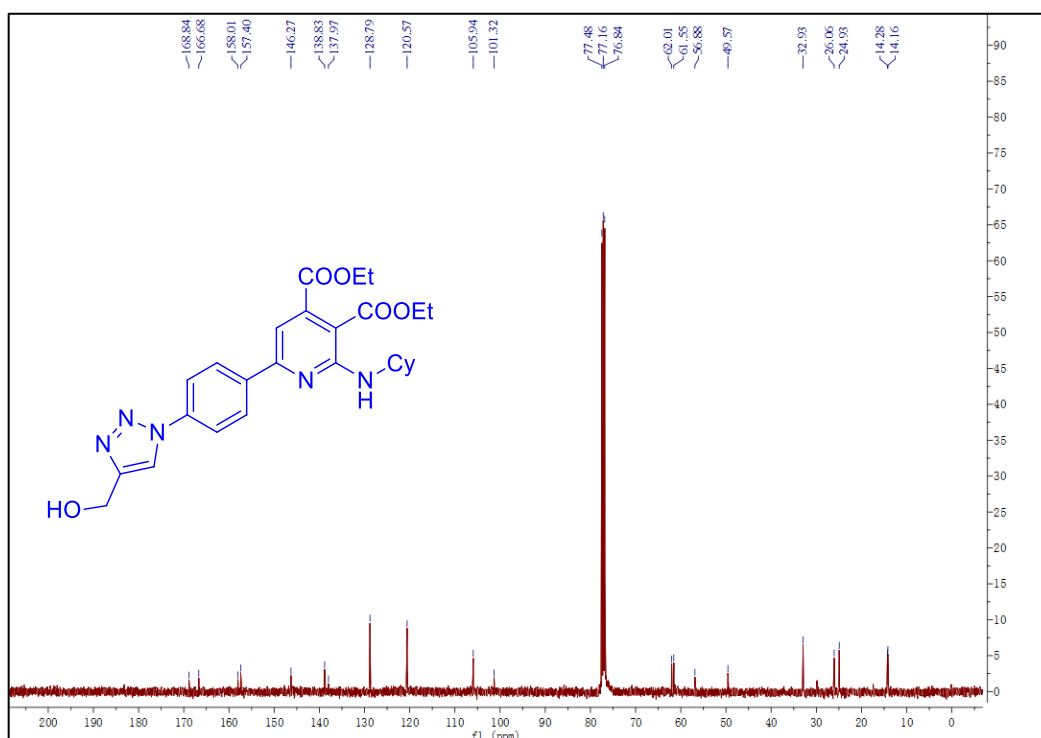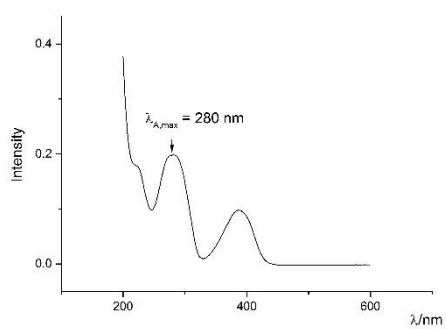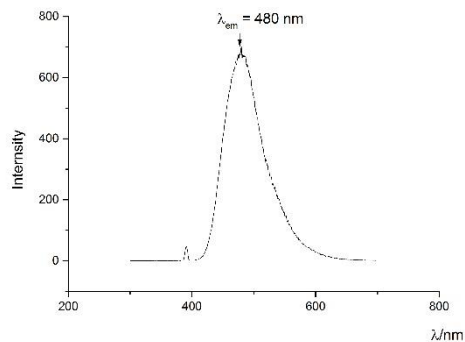

Figure S18. Fluorescence scan of SDS-PAGE gel of BSA protein by compound **15** and coomassie blue staining of SDS-PAGE gel of BSA protein by compound **15**

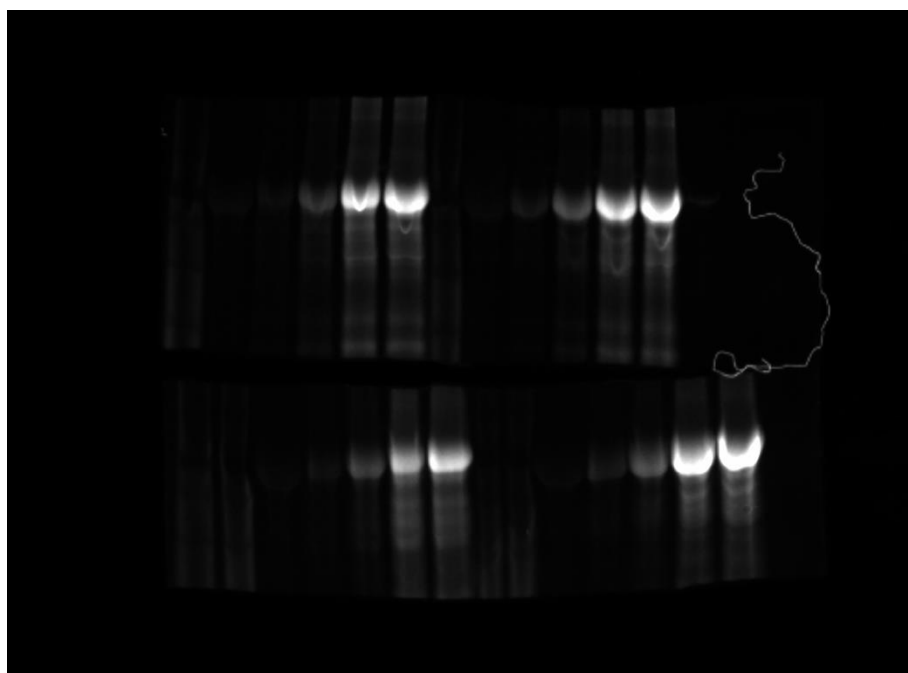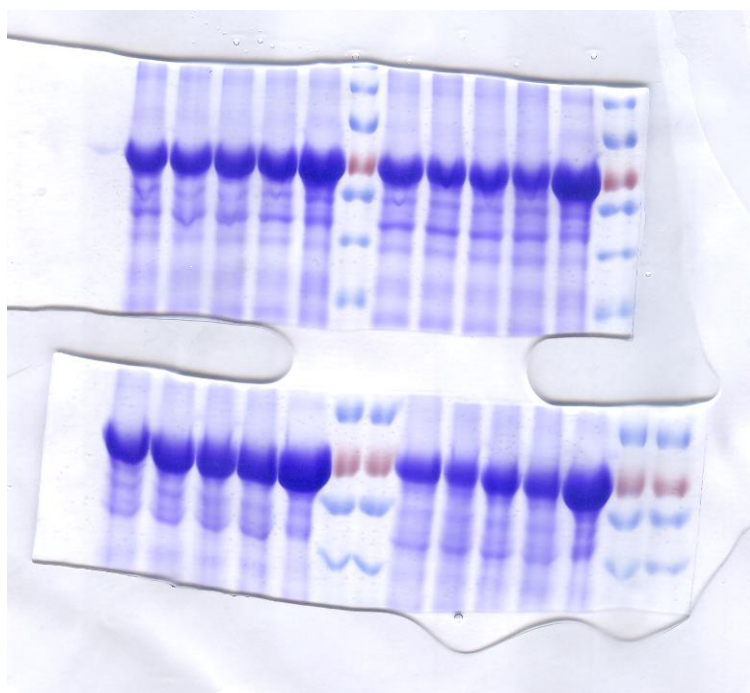

Supplement: s1 [file s1]
